1 **Title: HflX controls hypoxia-induced non-replicating persistence in slow growing**  
2 **mycobacteria.**

3  
4

5 **Authors:** NGAN Jie Yin Grace<sup>1,2</sup>, PASUNOOTI Swathi<sup>3</sup>, TSE Wilford<sup>3</sup>, MENG Wei<sup>3</sup>, NGAN So Fong  
6 Cam<sup>3</sup>, NG Sze Wai<sup>1,2</sup>, JAAFAR Muhammad Taufiq<sup>1,2</sup>, JIA Huan<sup>3</sup>, CHO Su Lei Sharol<sup>1,2</sup>, LIM Jieling<sup>1,2</sup>,  
7 KOH Hui Qi Vanessa<sup>1,2</sup>, ABDULGHANI Noradibah<sup>1,2</sup>, PETHE Kevin<sup>3,4</sup>, SZE Siu Kwan<sup>3</sup>, LESCAR Julien<sup>3</sup>  
8 and ALONSO Sylvie<sup>1,2\*</sup>.

9

10 **Affiliations:** <sup>1</sup>Department of Microbiology and Immunology; Yong Loo Lin School of Medicine, National  
11 University of Singapore, Singapore; <sup>2</sup>Life Sciences Institute, Immunology programme, National University  
12 of Singapore, Singapore; <sup>3</sup>School of Biological Sciences, Nanyang Technological University, Singapore;  
13 <sup>4</sup>Lee Kong Chian School of Medicine, Nanyang Technological University, Singapore.

14

15 **\*Corresponding author:** Center for Life Sciences, 28 Medical Drive, Immunology programme, Singapore  
16 117456, Singapore. Email: [micas@nus.edu.sg](mailto:micas@nus.edu.sg)

17

18 **Abstract**

19 GTPase HflX is highly conserved in prokaryotes and is a ribosome splitting factor during heat shock in *E.*  
20 *coli*. Here we report that HflX produced by slow growing *M. tuberculosis* and *M. bovis* BCG is a GTPase  
21 that plays a critical role in the pathogen's transition to a non-replicating, drug-tolerant state in response to  
22 hypoxia. Indeed, HflX-deficient *M. bovis* BCG (KO) replicated markedly faster in the microaerophilic  
23 phase of a hypoxia model, that precipitated entry into dormancy. The KO displayed the hallmarks of  
24 dormant mycobacteria including phenotypic drug resistance, altered morphology, low intracellular ATP  
25 and up-regulated dormancy *dos* regulon. KO-infected mice displayed increased bacterial burden during  
26 the chronic phase of infection, consistent with the higher replication rate observed *in vitro* in  
27 microaerophilic phase. Unlike fast-growing mycobacteria, BCG HflX was not involved in antibiotic  
28 resistance under normoxia. Proteomics, pull-down and ribo-sequencing supported that mycobacterial  
29 HflX is a ribosome binding protein that controls the translational activity of the cell. Collectively, our study  
30 provides further insights into the mechanisms deployed by mycobacteria to adapt to their hypoxic  
31 microenvironment.

32

33 **Key Words:** HflX; GTPase; ribosome splitting factor; dormancy; *dos* regulon.

34

35

## 36 Introduction

37 GTP binding proteins are found across all living kingdoms and are involved in the regulation of many  
38 cellular processes. Among which, the small GTPases act as molecular switches that are active or “on”  
39 when binding GTP and inactive or “off” when binding GDP. Universally conserved prokaryotic GTPases  
40 (ucpGTPases) are a core group of GTPases which are conserved in most prokaryotes, hinting at a critical  
41 function in biology (Verstraeten, 2011), though the actual physiological role of most of them has remained  
42 elusive. ucpGTPases are characterized by the presence of highly conserved motifs or domains, including  
43 the phosphate-loop (P-loop) within the G-domain, a characteristic site where GTP binding and hydrolysis  
44 occur (Bourne, 1990; Sprang, 1997).

45 High frequency of lysogenization X (HflX) protein belongs to the superfamily of the Obg-HflX-like  
46 ucpGTPases, class of Translation Factors (TRAFAC), which have been described to participate in protein  
47 translation, likely by providing energy for protein synthesis, or by facilitating the recycling of factors  
48 involved in translation (Laalami, 1996; Verstraeten, 2011). HflX was first reported as part of the *hflA* locus  
49 in *Escherichia coli* that controls the phage lysis–lysogeny decision process and was thus initially thought  
50 to play a role in transposition (Dutta, 2009). However, more recent work has shown that *E. coli* HflX acts  
51 as a ribosome-splitting factor under heat shock stress, whereby it binds to and splits stalled 50s ribosomal  
52 subunits (Coatham, 2016; Zhang, 2015). In *Staphylococcus aureus*, HflX binds to and dissociates  
53 hibernating 100S ribosomes (homodimeric 70S) into 50S and 30S subunits, thereby recycling the pool of  
54 ribosomes for new rounds of translation during the stationary phase (Basu, 2017). A recent study has  
55 reported a similar ability for HflX expressed by *Mycobacterium abscessus* and *M. smegmatis* to bind to  
56 and split ribosomal subunits (Rudra, 2020).

57 In *Mycobacterium tuberculosis* (Mtb), responsible for human tuberculosis, *hflX* has been categorized as a  
58 non-essential gene using a Transposon transposon site hybridization (TraSH) library (Sasseti, 2003).  
59 Other studies found that *hflX* gene expression was influenced by a variety of stressors ranging from  
60 antibiotics and chemical exposure, to environmental stresses such as nutrient starvation (Andreu, 2008;  
61 Boshoff, 2004; Dutta, 2010; FU, 2009; Manjunatha, 2009; Morris, 2005; Sherrid, 2010). Consistently, we  
62 previously reported that *hflX* is over-expressed in Mtb exposed to the hostile lysosomal environment of  
63 macrophages (Lin, 2016). Transcription of *hflX* was found to be linked with *whiB7*, a transcriptional

64 regulator that controls intrinsic antibiotic resistance and redox homeostasis in Mtb (Burian, 2012; Morris,  
65 2005). Exposure to antibiotics targeting the ribosomal complex including streptomycin, erythromycin,  
66 tetracycline, and pristinamycin was found to induce both *whiB7* and *hflX* expression (Hartkoorn, 2012).  
67 Consistently, absence of HflX in fast growing mycobacteria species *M. abscessus* and *M. smegmatis*  
68 increased antibiotic resistance to macrolide-lincosamide antibiotics (Rudra, 2020).

69 In this study, we investigated the physiological role of HflX in tubercle bacilli *M. bovis* BCG and *M.*  
70 *tuberculosis*. We report that Mtb/BCG HflX is a GTPase that is involved in response to hypoxia-induced  
71 persistence, a non-replicating state that allows tubercle bacilli to persist inside their host for extended  
72 periods and become phenotypically antibiotic-resistant (Gold, 2017; Kester, 2014). We provide  
73 experimental evidence that HflX interacts with ribosomal subunits and plays a master regulatory role in  
74 protein translation during transition to hypoxia.

## 75 **Results**

### 76 **Mycobacterial HflX is a GTPase with minimal ATPase activity.**

77 In the prokaryotic kingdom, HflX is widely distributed and conserved across species (Leipe, 2002;  
78 Verstraeten, 2011). The amino acid sequence of *M. tuberculosis* (Mtb) HflX is 100% and 84.5% identical  
79 to *M. bovis* BCG HflX and *M. leprae* HflX, respectively, while it shares about 45% identity within the  
80 GTPase catalytic site of *E. coli* HflX, including the P loop, Switch I-II, and G1-G5 domains (*Appendix*, Fig.  
81 S1A). A three-dimensional computational model was constructed by adopting a previously described  
82 strategy (Fischer, 2012). The Phyre2.0 modeling platform was employed to compare the predicted  
83 structure of Mtb HflX to that of *E. coli* HflX, whose crystal structure is available (PDB entry: 5ADY)  
84 (Zhang, 2015). As expected from the high level of amino-acid identity, a high degree of homology was  
85 observed visually and from the low root-mean-square-deviation (RMSD) score, which supports the  
86 conservation of HflX structure and function between these two evolutionarily distant prokaryotes  
87 (*Appendix*, Fig. S1B).

88 To investigate whether mycobacterial HflX is a GTPase, codon-optimized BCG/Mtb HflX was expressed  
89 in and purified from, *E. coli* (*Appendix*, Fig. S2A&B). Significant GTPase activity in the presence of MgCl<sub>2</sub>  
90 but limited ATPase activity could be observed (Fig. 1A&B; *Appendix*, Fig. S2C). A mutant harboring a  
91 triple amino acid substitution (AAY) in the predicted GTPase catalytic site was also generated (*Appendix*,  
92 Fig. S2A) and was found to be unable to hydrolyze GTP (Fig. 1A). Furthermore, direct interaction  
93 between mycobacterial HflX and GTP hydrolysis product GDP, was demonstrated by isothermal titration  
94 calorimetry (ITC) with a dissociation constant K<sub>d</sub> at 1.89 μM and a 1:1 stoichiometry (Fig. 1C&D). On the  
95 other hand, no significant interaction between the triple mutant HflX and GDP was observed. These data  
96 thus establish that HflX produced by Mtb and *M. bovis* BCG is a GTPase with minimal ATPase activity.

97

### 98 **Mycobacterial HflX is involved in adaptation to hypoxia**

99 *E. coli* HflX has been reported to be a ribosome splitting factor responding to heat shock (Dey, 2018;  
100 Zhang, 2015). We thus investigated whether HflX from tubercle bacilli would have a similar function. A *M.*  
101 *bovis* BCG HflX null mutant ( $\Delta hflX$ ) and its complemented strain ( $\Delta hflX::phflX$ ) were constructed  
102 (*Appendix*, Fig. S3A). RT-PCR revealed undetectable levels of *hflX* mRNA in BCG  $\Delta hflX$ , while the

103 complemented strain displayed *hflX* mRNA level similar to the parental strain (*Appendix*, Fig. S3B).  
104 Comparable growth kinetics were observed amongst WT,  $\Delta hflX$ , and  $\Delta hflX::phfIX$  strains when cultured in  
105 standard 7H9 liquid culture medium (*Appendix*, Fig. S3C), supporting that HflX is non-essential for *in vitro*  
106 growth in rich aerated (normoxic) culture medium at 37<sup>0</sup>C.  
107 Mycobacterial HflX was not found to play a role during heat shock as evidenced by comparable number  
108 of colony-forming units (CFU) amongst the WT,  $\Delta hflX$ , and complemented strains (Fig. 2A). Furthermore,  
109 codon-optimized BCG HflX or homologous *E. coli* HflX were expressed in  $\Delta hflX$  *E. coli* under the control of  
110 an arabinose-inducible promoter (*E. coli*  $\Delta hflX::pBCGhflX$  and *E. coli*  $\Delta hflX::hflX$ ). The *hflX* mRNA levels  
111 in both strains were comparable and about 100 times higher than the endogenous level measured in WT  
112 *E. coli* (*Appendix*, Fig. S3D). Upon heat shock, expression of homologous HflX partially restored parental  
113 survival, while codon-optimized BCG HflX did not confer protection to the  $\Delta hflX$  *E. coli* strain (Fig. 2B).  
114 Thus together, these observations support that mycobacterial HflX is unlikely to be involved in the heat  
115 shock response.  
116 To probe a possible physiological role of mycobacterial HflX during adaptation to other stresses, the BCG  
117 WT,  $\Delta hflX$ , and complemented strains were grown under various conditions, including macrophage  
118 infection, nutrient starvation (Loebel *in vitro* model), and gradual oxygen depletion (Wayne *in vitro* model).  
119 No significant difference among the three strains was observed during macrophage infection and under  
120 nutrient starvation (*Appendix*, Fig. S4A&B). Growth profiles were then monitored in the gradual oxygen  
121 depletion model (aka Wayne model). In this *in vitro* model, mycobacteria growth is characterized by two  
122 stages, namely the non-replicating persistence stage 1 (NRP-1) or microaerophilic stage, during which  
123 mycobacteria slow-down replication while oxygen gets progressively depleted in the sealed tube (<1.0%  
124 O<sub>2</sub>); and the non-replicating persistence stage 2 (NRP-2), characterized by an oxygen tension below 0.06  
125 % and where mycobacteria have stopped replicating and enter a dormant state (Wayne, 1996; Wayne,  
126 2001). In this model, during the NRP-1 stage (days 3-8), the BCG  $\Delta hflX$  culture was found to grow faster  
127 than the WT and complemented strains, as evidenced by significantly higher OD<sub>600nm</sub> values and CFU  
128 counts (Fig. 2C&D). The growth of BCG  $\Delta hflX$  ceased on day 8 onwards as evidence by plateaued  
129 OD<sub>600nm</sub> values, and reached the NRP-2 stage at day 14 (as indicated by complete decolorization of  
130 methylene blue indicator), while the WT and complemented strains reached NRP-2 by day 18 and 17,

131 respectively (Fig. 2C&D). The differential growth kinetic profile observed in the Wayne model with the  
132 HflX-deficient strain thus pointed at a role for HflX in controlling growth rate during the microaerophilic  
133 phase and entry of mycobacteria into the non-replicating state.

134 Changes in cell morphology have been reported previously for non-replicating mycobacteria grown under  
135 hypoxic conditions and external acidification, including thickening of the cell wall, size reduction, and  
136 ovoid cell formation (Jakkala, 2019; Shleeva, 2011; Velayati, 2011). The size and morphology of BCG  
137  $\Delta hflX$  mycobacteria grown in the Wayne model were studied by scanning electron microscopy. A 43%  
138 reduction in size was observed with BCG  $\Delta hflX$  at day 8 (NRP-1) compared to its size at day 0, while the  
139 average size of WT and complemented strains was comparable to day 0 (Fig. 2E,F). At day 21 (NRP-2),  
140 the size of WT and complemented strains decreased significantly compared to the NRP-1 stage and day  
141 0, reaching a size that was similar to that measured with  $\Delta hflX$  strain (Fig. 2E,F). These observations,  
142 therefore, suggested that the  $\Delta hflX$  mutant displayed a non-replicative phenotype earlier than the WT and  
143 complemented strains.

144 We were next interested to test whether HflX impacts mycobacterial growth in a mammalian host where  
145 oxygen saturation ranges between 1-14% depending on the organ, thereby likely exposing mycobacteria  
146 to microaerophilic environments (Carreau, 2011; Liu, 2011). Upon intratracheal infection, the number of  
147 CFUs recovered at weeks 2 and 4 from the lungs, spleen and lymph nodes of mice infected with WT,  
148  $\Delta hflX$  and complemented strains were mostly comparable (*Appendix Fig. S4E*). In contrast, from week 8  
149 onwards, which corresponds to the chronic phase of infection triggered by the host adaptive immunity  
150 (Köhler, 1975; Nicolle, 2004), the bacterial loads measured in these organs were consistently higher in  
151 mice infected with  $\Delta hflX$  compared to the parental and complemented strains (Fig 2G). These findings  
152 were consistent with the higher replication rate observed with  $\Delta hflX$  mutant during microaerophilic phase  
153 of the *in vitro* hypoxic Wayne model, and supported a role for HflX in the physiological response of  
154 mycobacteria to low oxygen tension environments that are encountered during the course of infection in  
155 the human host.

156

157 **Absence of HflX impairs the energetic status of hypoxic mycobacteria.**

158 We previously reported that under gradual oxygen depletion, the intracellular ATP level drops significantly  
159 in mycobacteria (Rao, 2007). We thus monitored the intracellular ATP levels in BCG  $\Delta hflX$  grown in the  
160 Wayne model. While comparable intracellular ATP levels were measured at day 0 for the WT,  $\Delta hflX$ , and  
161 complemented strains, significantly lower ATP levels were obtained with the  $\Delta hflX$  strain at all the  
162 subsequent time points (Fig. 3A). Furthermore, we also determined the membrane potential ( $\Delta\psi$ ) of the  
163 three strains using cationic fluorescent dye DiOC<sub>2</sub>, as previously described (Rao, 2007; Vaara, 1992) .  
164 Negative controls consisted of cultures incubated with proton-ionophore cyanide m-chlorophenyl  
165 hydrazine (CCCP) that dissipates the transmembrane proton gradient ( $\Delta\text{pH}$ ) component of proton motive  
166 force (PMF). BCG  $\Delta hflX$  displayed an overall 17-46 % increase of  $\Delta\psi$  values compared to WT and  
167 complemented strains, with a 2-fold increase on day 3 (Fig. 3B), suggesting that the plasma membrane of  
168 BCG  $\Delta hflX$  is hyperpolarized during growth in the Wayne model. Of note, the addition of CCCP only  
169 caused a slight reduction of RFU, presumably reflecting an incomplete depolarized state of the  
170 membrane.

171 Altogether, our data indicated that under gradual oxygen depletion, BCG  $\Delta hflX$  displays significantly  
172 lower ATP levels compared to WT and complemented strains that could explain its earlier entry into a  
173 non-replicating state. The membrane hyperpolarization observed may reflect a compensatory mechanism  
174 to maintain the PMF for *de novo* ATP synthesis critical for mycobacterial survival (Srinivasa PS Rao et al.,  
175 2007).

176

177 **BCG  $\Delta hflX$  exhibits phenotypic drug resistance in NRP-1 that correlated with up-regulation of the**  
178 ***dos regulon*.**

179 The phenotypes displayed by  $\Delta hflX$  in Wayne model prompted us to investigate the drug susceptibility  
180 profile of this mutant. Phenotypic drug resistance of non-replicating mycobacteria induced under hypoxia,  
181 nutrient starvation, or stationary phase has indeed been well described (Franzblau, 2012;  
182 Lakshminarayana, 2015; Rao, 2007). This phenomenon is believed to explain the prolonged  
183 chemotherapy necessary to achieve sterility and cure in TB patients (Davies, 2010; McCune, 1966;  
184 McCune, 1956; Nuernberger, 2004). Here, we investigated the susceptibility of BCG  $\Delta hflX$  to various  
185 anti-mycobacterial drugs with different mechanisms of action, namely bedaquiline BDQ, isoniazid INH,



186 streptomycin STM, rifampicin RIF, chloramphenicol CM, and ethambutol ETB. WT,  $\Delta hflX$  and  
187 complemented strains grown under aerobic conditions displayed comparable minimum inhibitory  
188 concentrations (MIC) (*Appendix*, Table S1). In NRP-1 of the Wayne model, however, BCG  $\Delta hflX$   
189 displayed high resistance to BDQ, INH, and STM, with only 1-2  $\log_{10}$  decrease in CFU/mL compared to  
190 the drug-free control, while WT and complemented strains displayed between 3-8  $\log_{10}$  reductions in  
191 CFU/mL when exposed to these drugs (Fig. 3C). Of note, BCG  $\Delta hflX$  did not display increased drug  
192 resistance to RIF compared to WT and complemented strains. In the NRP-2 stage, all three strains were  
193 resistant to BDQ, INH, and STM and remained susceptible to RIF (Fig. 3D), consistent with previous  
194 studies reporting that RIF is very effective at killing non-replicating mycobacteria (Iacobino, 2017;  
195 Iacobino, 2016; Tomasz, 1970). The lack of killing efficacy of non-replicating mycobacteria observed with  
196 BDQ, previously shown to kill both actively replicating and non-replicating mycobacteria (Andries, 2005;  
197 Haagsma, 2011), may be explained by the fact that this drug exerts a delayed killing (Koul, 2014), and  
198 that 5-day incubation may not be sufficient to observe significant killing of non-replicating mycobacteria  
199 (Piccaro, 2015).

200 Furthermore, the two-component system DosS/T-R has been known to mediate mycobacteria transition  
201 to a non-replicating state in response to various stresses, including low oxygen tension (Bretl, 2011;  
202 Gautam, 2014; Kendall, 2004; Sharma, 2016). The sensory kinases DosS or DosT activate transcriptional  
203 regulator DosR by phosphorylation, leading to the transcription of a 48 gene-regulon (aka *dos* regulon)  
204 (Bagchi, 2005; Roberts, 2004; Saini, 2004; Sousa, 2007). We thus examined the transcriptional activity of  
205 the *dos* regulon in BCG  $\Delta hflX$ . A significant increase in the transcription level of a number of *dos* regulon  
206 genes (*dosR*, *dosS*, *dosT*, and *hspX*) was found with the  $\Delta hflX$  mutant in the NRP-1 phase (day 8) of the  
207 Wayne model with average fold-increases of 5X, 3X, 1.5X and 6X respectively compared to WT (Fig. 3E  
208 and *Appendix* Fig. S4 C&D).

209 Together, both the phenotypic drug resistance profile and up-regulation of the *dos* regulon in the NRP-1  
210 stage of the Wayne model, further supported that in this gradual oxygen depletion model, BCG  $\Delta hflX$   
211 enters a non-replicating state earlier than its parental counterpart.

212

213 **Differential proteomic profile in BCG  $\Delta hflX$  in response to hypoxia**

214 As a ribosome-splitting factor, *E. coli* HflX influences the translational activity in this bacterium. To  
215 understand the mechanisms by which HflX plays a role in triggering the non-replicating state in tubercle  
216 bacilli, we employed tandem mass tag mass spectrometry (TMT-MS) to analyze the relative protein  
217 abundance in  $\Delta hflX$  BCG compared to the parental strain when grown under hypoxic conditions. Results  
218 indicated differential protein content between WT and  $\Delta hflX$  at all the time points tested (day 0, day8, and  
219 day 17) (Fig. 4; *Appendix*; Tables S2-S4). At day 0, 66 and 56 proteins were down- and up-regulated in  
220 BCG  $\Delta hflX$ , respectively (Fig. 4A). According to gene ontology analysis, significant enrichment was found  
221 for down-regulated proteins involved in lipid biosynthesis and metabolism, cell wall components  
222 biogenesis and assembly, leucine biosynthesis, protein folding and response to copper ion (Fig. 4D). At  
223 day 8, extensive differential protein abundance was seen between the BCG  $\Delta hflX$  and WT, with 151 up-  
224 regulated and 201 down-regulated proteins (Fig. 4B). Among the 151 up-regulated proteins, 15 were  
225 encoded by genes from the *dos* regulon (*Appendix*, Table S3, bolded), in line with the observed up-  
226 regulation of *dos* regulon genes at the transcriptional level. Furthermore, and consistent with a potential  
227 regulatory role of HflX in translational activity of the bacterium, the day-8  $\Delta hflX$  sample was enriched in  
228 ribosomal subunits (*Appendix*, Table S3, highlighted in yellow) and in proteins involved in formation of the  
229 hibernating ribosome (HPF, RafH) (*Appendix*, Table S3, highlighted in green). Also, in that sample, many  
230 of the up-regulated proteins were assigned to central metabolism (PfkB, Gap, FabG1, CitA, AceA, Icd2,  
231 and SdhB) (*Appendix*, Table S3). The proteins that were down-modulated at day 8 were similar to those  
232 down-regulated at day 0 (Fig. 4E). Interestingly, at day 0 and day 8, BCG  $\Delta hflX$  displayed significantly  
233 lower amounts of seven proteins (Mas, FadD26, FadD29, FadD22, PpsB, PpsC, PpsD) (*Appendix*, Table  
234 S2) encoded by the operon involved in the synthesis of phenolphthiocerol and phthiocerol  
235 dimycocerosates (PDIM), a major long-chain fatty acid component of the cell wall in mycobacteria (Azad,  
236 1997; Jackson, 2014; Jackson, 2007). Finally, at day 17, where both strains have reached a non-  
237 replicating state (NRP-2), 15 proteins involved in the response to starvation and copper ion were found to  
238 be up-regulated in BCG  $\Delta hflX$ , while 27 proteins involved in sulfur compound metabolism, cysteine  
239 synthesis, and oxidoreductase activity were down-regulated (Fig. 4C&F, *Appendix*, Table S4).

240 Together, this proteomic approach revealed massive changes at the protein level in the BCG  $\Delta hflX$   
241 mutant compared to WT, particularly at day 8 of the Wayne model, which supports a master regulatory  
242 role for HflX in response to hypoxia.

243

#### 244 **Mycobacterial HflX interacts with ribosomal subunits and regulates protein translation**

245 *E.coli* HflX binds at the E-site of 70S bacterial ribosomes and induces split into 50S/30S ribosomal  
246 subunits upon GTP hydrolysis (Coatham, 2016). Using a biochemical approach, a recent study reported  
247 that HflX produced by *M. abscessus* and *M. smegmatis* is also a ribosome splitting factor (Rudra, 2020).  
248 To investigate whether HflX expressed by slow growing *M. bovis* BCG interacts with ribosomal subunits,  
249 we conducted a cell-based pull-down experiment combined with LC/MS analysis using a home-made  
250 anti-HflX monoclonal antibody (Appendix, Fig S2D&E). Results showed that the pull-down fraction was  
251 enriched in ribosomal proteins, namely S6 and S17 of the 30S ribosomal subunits; and L27 and L30 of  
252 the 50S ribosomal subunits, thus supporting that HflX binds to ribosomes (Table 1).

253 To further confirm the regulatory role of mycobacterial HflX in protein translation in response to hypoxia,  
254 BCG  $\Delta hflX$  or WT bacteria were harvested at day 8 in the Wayne model and were analyzed by ribo-  
255 sequencing. This approach revealed the presence of ribosomally protected footprints covering canonical  
256 non-coding RNAs (ncRNAs) such as tRNAs and rRNAs, a feature previously reported in a ribo-seq study  
257 conducted in *Mycobacterium abscessus* (Miranda-CasoLuengo, 2016). We found an enrichment in tRNA  
258 ribosome footprints in the BCG  $\Delta hflX$  compared to WT, while total RNA-seq indicated that the  
259 percentages of reads mapped to the respective regions (tRNA, rRNA, CDS and Other) were similar  
260 between both strains (Fig.5A, Appendix Fig. S6). Otherwise, the percentage of reads mapped to rRNA,  
261 CDS and 5' and 3' untranslated regions (Others) by Ribo-seq were generally higher in WT (Fig. 5A). The  
262 translation efficiency (TE) of 1,361 coding sequences (CDS) was found to be significantly ( $\text{Log}_2\text{TE}>1$ ,  
263  $\text{Log}_2\text{TE}<-1$ ) different between  $\Delta hflX$  and WT, among which 781 had a lower TE in  $\Delta hflX$ , representing  
264 approx. 60% of the CDS (Fig. 5B). Interestingly, genes coding for ribosomal subunits were those with the  
265 greatest increase in TE in  $\Delta hflX$  (Fig. 5C). This finding was consistent with our proteomics data, and  
266 suggested that in the absence of HflX, less free ribosome subunits are available inside the cell, leading  
267 bacteria to up-regulate the corresponding genes. Genes involved in metabolic pathways including carbon

268 metabolism, citrate cycle and oxidative phosphorylation were also found to have their translation  
269 efficiency up-regulated in  $\Delta hflX$  (Fig 5C). This again may represent a feedback response to the lower ATP  
270 pool measured in  $\Delta hflX$ . Among the genes whose translation efficiency was significantly down-regulated  
271 in  $\Delta hflX$ , the PPE family genes, genes involved in response to stimuli, and two-component systems were  
272 enriched (Fig. 5D).

273 Together, these data support that mycobacterial HflX interacts with ribosomes and plays a regulatory role  
274 in protein translation under hypoxic stress.

275

## 276 Discussion

277 Mtb can survive for decades in a dormant state, causing a clinically asymptomatic, non-infectious form of  
278 the disease that is known as latent TB infection (LTBI) (Dye, 1999; Parrish, 1998). It is estimated that  
279 about one-third of the world's population has LTBI, providing a large reservoir for reactivation to active,  
280 contagious disease (WHO., 2019; Veatch and Kaushal., 2018). The ability of dormant Mtb to exhibit a  
281 form of non-inheritable resistance to most of the currently available anti-TB drugs (aka phenotypic drug  
282 resistance) explains the long treatment regimen needed to achieve sterilization, and has impeded the  
283 efforts in TB elimination (Bloom, 1992; Gomez, 2004; Parrish, 1998). During latent infection, non-  
284 replicating Mtb bacilli localize within granuloma, an organized structure of immune cells intended to  
285 constrain the infection (Dheda, 2005; Orme, 2014; Russell, 2007). The hypoxic microenvironment of  
286 granuloma is believed to trigger replication arrest in pathogenic mycobacteria (Dannenberg, 1993;  
287 Manabe, 2006; Rustad, 2009; Wayne, 2001). The dormancy survival regulon, aka *dos* regulon, is  
288 regulated by the two-component system Dos S/T and DosR and comprises 48 genes, which have been  
289 shown to be essential for hypoxic survival (Boon, 2002; Leistikow, 2010; Park, 2003; Roberts, 2004;  
290 Sherman, 2001). However, the molecular mechanisms involved in the hypoxic response and replication  
291 arrest of pathogenic mycobacteria have remained elusive. Our present work has identified the highly  
292 conserved GTPase HflX as a novel mycobacterial factor that plays an important role in the pathogen's  
293 response to its hypoxic environment. Our findings are in line with previous reports on the role of HflX in  
294 stress adaptation in other distantly related microorganisms (Basu, 2017; Zhang, 2015). However, instead  
295 of heat shock, mycobacterial HflX responded specifically to oxygen limitation, a physiologically relevant  
296 stress that mycobacteria encounter in their host environment. Our data support that HflX regulates the  
297 translational activity in slow growing pathogenic mycobacteria, and controls entry into the non-replicating  
298 state. We further showed that BCG/Mtb HflX is a ribosome-interacting protein, as evidenced by the  
299 enrichment in ribosomal subunits in the pull-down fraction (Table 1). This was consistent with the  
300 ribosome-splitting activity of HflX described in *E. coli* and *S. aureus* (Basu, 2017; Zhang, 2015), as well as  
301 in fast growing mycobacteria species (NTM) *M. abscessus* and *M. smegmatis* (Rudra, 2020).  
302 Interestingly, while the latter study reported that HflX-deficient *M. smegmatis* and *M. abscessus* displayed  
303 resistance to macrolide-lincosamide, we did not observe any drug resistance phenotype with  $\Delta hflX$  BCG

304 mutant grown in normoxia, including macrolides such as erythromycin (Table S1). Macrolide-lincosamide  
305 has been used effectively to treat non-tuberculous mycobacteria (NTM) infections (Binder, 2013; Maxson,  
306 1994; Mushatt, 1995). However, mycobacteria from the Mtb complex (which includes *M. tuberculosis*, *M.*  
307 *bovis* BCG and others, but not *M. smegmatis* or *M. abscessus*) have been found to be intrinsically  
308 resistant to macrolides due to the presence of Erm methyltransferase (ErmMT) that confers resistance to  
309 macrolide-lincosamide-streptogramin (MLS) by methylation of 23S rRNA (Andini, 2006; Buriánková,  
310 2004). Of note, part of the *ermMT* locus has been deleted in the vaccine strain *M. bovis* BCG Pasteur,  
311 making this strain susceptible to erythromycin. Maintenance of erythromycin susceptibility in BCG  $\Delta hflX$   
312 mutant suggests a differential role of HflX between tubercle bacilli and NTM in adaptation to stress.

313 The hallmark of non-replicating bacilli includes low energy profile and global protein synthesis down-  
314 regulation (Hu, 1998; Ignatov, 2015; Schnappinger, 2003; Shi, 2005). In *E. coli*, global translation shut  
315 down is associated with ribosome dimerization into a 100S ribosome species, which is translationally  
316 inactive when conditions are not favorable for bacterial growth (Gohara, 2018; Starosta, 2014; Wada,  
317 1995; Yamagishi, 1993). Under hypoxic stress, Mtb 70S ribosomes do not dimerize into 100S but  
318 associate with hibernating promoting factor (HPF) and ribosome-associated-factor-during-hypoxia (RafH)  
319 into a stable complex (Li, 2015; Mishra, 2018; Trauner, 2012). Ribosome stabilization is a strategy  
320 deployed by bacteria for stress management, so when cellular conditions become favorable, the  
321 hibernating ribosomes get disassembled and quickly recycled for new rounds of translation (El-Sharoud,  
322 2004; Gohara, 2018). The plasticity of hibernating ribosome disassembly has been proposed to play an  
323 essential role in the TB disease reactivation process (Sawyer, 2018; Trauner, 2012). It has been shown  
324 that *E. coli* and *S. aureus* HflX rescued stalled ribosomes and hibernating 100S ribosomes by splitting  
325 them into the 50S and 30S subunits, allowing translation to resume (Basu, 2017; Zhang, 2015). Our  
326 proteomics and ribo-seq data indicated an increased abundance in HPF and RafH, and downregulation of  
327 30% of the total translome, respectively, in BCG  $\Delta hflX$  under oxygen limitation. We thus propose a  
328 model whereby under hypoxia, HflX controls the amounts of ribosomal subunits available for translation  
329 by splitting hibernating ribosomes and/or stalled ribosomes, thereby controlling the overall translational  
330 activity, hence entry into the non-replicating state (Fig. 6). Absence of HflX leads to accumulation of  
331 hibernating and stalled ribosomes, precipitating entry into a non-replicating state. The fact that HflX is

332 dispensable in normoxia suggests that either the amount of hibernating ribosomes and stalled ribosomes  
333 is negligible, or other splitting factors are at play. The increased amount of individual ribosomal subunits  
334 observed in the HflX-deficient mutant could result from a compensatory mechanism that aims to  
335 overcome the overall translation shutdown. Alternatively or in addition, Mtb/BCG HflX may also be directly  
336 involved in the biogenesis of ribosomal subunits as proposed for several bacterial GTPases, among  
337 which many are from the TRAFAC class (Bennison, 2019; Britton, 2009; Campbell, 2008). Furthermore,  
338 the extensive changes in proteomic and Ribo-seq profiles observed with BCG  $\Delta hflX$  (including proteins  
339 involved in various cellular processes such as central metabolism and cell wall synthesis), coupled with  
340 the higher replication rate during the microaerophilic phase and the increased bacterial burden in the  
341 chronic phase of infection in mice, suggest a master regulatory role for HflX in mycobacteria's response to  
342 their hypoxic environment. Consistently, some of the TRAFAC-GTPases have been implicated in various  
343 cellular processes such as cell wall metabolism, chromosome segregation, and cell division initiation  
344 (Britton, 2000; Britton, 1998; Caldon, 2003; Cladière, 2006; Foti, 2007; Gollop, 1991). Whether these  
345 pleiotropic effects are a downstream consequence of the regulatory role of HflX in the bacterium's  
346 translational activity or are independent of it remains to be investigated.

347 Overall, our work uncovers the physiological role of the highly conserved HflX GTPase in slow growing  
348 pathogenic mycobacteria, and provides further insights into the mechanisms by which this pathogen  
349 adapts to its environment. Such fundamental knowledge may help design alternative strategies to  
350 accelerate or potentiate the killing efficacy of current TB drugs.

## 351 **Methods**

### 352 **Strains, Plasmids and Growth Conditions**

353 Bacterial strains, plasmids, and primers used are listed in Appendix Tables S5 and S6. Mycobacteria  
354 were grown in Middlebrook 7H9 liquid medium (BD Difco™, CAT No.: 271310) supplemented with 0.5 %  
355 (v/v) glycerol, 0.05 % (v/v) Tween 80 and 10 % (v/v) Albumin and Dextrose; and plated on Middlebrook  
356 7H11 Agar Base (BD Difco™, CAT No.: 271310) supplemented with Middlebrook OADC (BD Difco, CAT  
357 No.: 212351). When appropriate, hygromycin (50 µg/ml) (Roche, CAT No.: 10843555001) and kanamycin  
358 (50 µg/ml) (Thermo-Fisher Scientific, CAT No.: 11815032) was added to the media.

359 *E. coli* K-12  $\Delta hflX$  strain was purchased from Keio Collection (JW4131-1). *E. coli* strains were grown in  
360 Luria-Bertani (LB) broth (Sigma-Aldrich, CAT No.: L3022) and agar (BD Difco™, CAT No.: 244520). All  
361 pre-cultures were grown from frozen stock seeded in LB and cultured at 37 °C overnight under shaking  
362 conditions. Antibiotic ampicillin (100 µg/ml) (Sigma-Aldrich, CAT No.: A9518) was added into the medium  
363 where necessary for plasmid maintenance. Arabinose (Sigma-Aldrich, CAT No.: 10850) was added to the  
364 cultures when indicated for gene induction. Information on strains is provided in Appendix Table S5.

365

### 366 **Construction of knock-out and complemented strains**

367 *M. bovis* BCG  $\Delta hflX$  was generated via a double homologous recombination event, as previously  
368 described (Bardarov, 2002). Briefly, homologous regions (HR) flanking the 5' and 3' ends of *hflX* were  
369 amplified from the WT BCG genome using primers described in Table S2, and cloned into the pYUB854  
370 vector (Bardarov, 2002) with a hygromycin-resistance (*hygr*) cassette lies between both HRs.  
371 Transformants were plated onto 7H11 agar plates containing hygromycin, and resistant colonies were  
372 selected after 3 weeks of incubation for further validation. Successful knockouts were verified at the  
373 genomic level by PCR and at the transcriptional level by qRT-PCR.

374 The BCG  $\Delta hflX$  mutant strain was complemented by reintroducing WT *hflX* open-reading frame (ORF)  
375 under the control of constitutive *hsp60* promoter (BCG  $\Delta hflX$  :: *phflX*) back into the genome using  
376 pMV306 integrative plasmid (Stover, 1991). Transformants were plated onto kanamycin-7H11 agar  
377 plates, and resistant colonies were selected for further screening after 3 weeks incubation. Successfully



378 complemented  $\Delta hflX$  clones were validated at the genomic level by PCR and at the transcriptional level  
379 by qRT-PCR.

380 *E. coli* K-12  $\Delta hflX$  strain was complemented by reintroducing *hflX* ORF using pBAD replicative plasmid  
381 (Invitrogen, CAT No.: V44001) *E. coli hflX* locus was amplified from WT *E. coli* K-12 genome (*E. coli*  $\Delta hflX$   
382 :: *phflX*), while BCG *hflX* sequence was codon-optimized for *E. coli* expression (Stothard, 2000) and  
383 synthesized by GenScript (New Jersey, USA) (*E. coli*  $\Delta hflX$  :: *pBCGhflX*). Both ORFs were expressed  
384 under the control of inducible arabinose promoter (*ara*), and the final plasmid vectors were electroporated  
385 into  $\Delta hflX$  *E. coli*. Transformants were plated onto LB plates containing ampicillin. Resistant colonies were  
386 picked and verified at the transcriptional level by qRT-PCR.

387

### 388 **Heat Shock assay**

389 Mid-log phase WT,  $\Delta hflX$ , and *hflX* complemented *E. coli* cultures (OD<sub>600nm</sub> 0.6) were diluted down to  
390 OD<sub>600nm</sub> 0.1 with fresh LB broth. The bacterial cultures were then exposed to a temperature at 55°C for 10  
391 minutes as previously described (Zhang et al., 2015). Bacterial viability was determined by plating on LB  
392 plates and incubated at 37°C, and the colony forming units (CFU) were enumerated. The same parameter  
393 of heat shock was applied to  $\Delta hflX$ , and *hflX* complemented BCG cultures.

394

### 395 **Wayne model**

396 The protocol was performed based on the previously described Wayne hypoxia model (Wayne, 1996). In  
397 short, mid-log phase BCG cultures (OD<sub>600nm</sub> 0.6) were maintained in supplemented Dudos media and  
398 diluted to a final volume of 17mL (OD<sub>600nm</sub> 0.005) in a glass tube containing a magnetic stir bar. The ratio  
399 between headspace and culture volume was also kept constant, as previously described (Wayne, 1996).  
400 The tubes were then tightly sealed with an airtight silicone seal cap and several layers of Parafilm M® to  
401 prevent oxygen diffusion. The tubes were incubated on a magnetic platform set at 170 rpm at 37°C for 3  
402 weeks. Methylene blue was added at 0.015 µg/mL as a hypoxia control. At indicated time points (days 0,  
403 3, 6, 8, 10, 14, 17 and 21), the airtight seal was broken open to measure turbidity (OD<sub>600nm</sub>) and  
404 enumerate CFU by plating appropriate dilutions of bacterial cultures on 7H11 agar plates to determine  
405 bacterial viability after hypoxic exposure.

406 To test antibiotics susceptibility, antibiotics [BDQ: Bedaquiline; INH: Isoniazid (Sigma-Aldrich, CAT  
407 No.: PHR1937); STM: Streptomycin (Sigma-Aldrich, CAT No.:S6501); RIF: Rifampicin (Sigma-Aldrich,  
408 CAT No.:R3501); CM: Chloramphenicol (MP-Bio, CAT No.:02190321); ETM: Ethambutol (Sigma-  
409 Aldrich, CAT No.:E4630)] were quickly injected into the tubes using a needle syringe, and the tubes  
410 were sealed back with several layers of parafilm. The bacterial cultures were incubated for another 5-  
411 days period on the magnetic platform with constant agitation at 100 rpm at 37 °C before plating onto  
412 7H11 agar plates and incubation for 3 weeks at 37°C and 5% CO<sub>2</sub>. CFU were enumerated and  
413 compared to the drug-free control.

414

#### 415 **Mice Infection**

416 Animal experiments were approved by the Institutional Animal Care and Use Committee of the National  
417 University of Singapore (NUS) under protocol R16-0531 and were performed in the AALAAC-accredited  
418 animal facilities at NUS. Adult (7–8 weeks old) female Jackson C57BL/6 mice were purchased from  
419 InVivos (Singapore) and were intratracheally (IT) infected with ~10<sup>6</sup> CFU of *M. bovis* BCG strains (WT,  
420  $\Delta hflX$ , and  $\Delta hflX :: phfIX$ ). At the indicated time points, lungs, lymph nodes, and spleens from euthanized  
421 mice were harvested and homogenized in PBS + 0.1% Triton X-100. Appropriate dilutions of the organ  
422 homogenates were plated onto 7H11 agar plates for CFU determination after 2 weeks incubation at 37°C  
423 and 5% CO<sub>2</sub>.

424

#### 425 **Quantification of Intracellular ATP**

426 A previously described method was followed (Rao, 2007). Briefly, intracellular ATP was quantified by  
427 using the BacTiter-Glo Microbial Cell Viability Assay Kit (Promega CAT No.: G8230). Aliquots of 100 µl of  
428 bacterial culture were collected at various time points and mixed with an equal volume of the BacTiter-Glo  
429 reagent and incubated for 5 min in the dark. The emitted luminescence was detected by using M200 Pro  
430 plate reader and was expressed as relative luminescence units.

431

#### 432 **Measurement of the Membrane Potential**

433 A previously described method was followed (Rao, 2007). Briefly, the membrane potential ( $\psi$ ) was  
434 detected by using BacLight™ Bacterial Membrane Potential Kit (Invitrogen™ CAT No.: B34950). 100  $\mu$ l of  
435 bacterial cultures were collected at various time points and mixed with an equal volume of 60  $\mu$ M DiOC2  
436 (3,3-diethyl-oxa-carbocyanine iodine, fluorescent dye). After for 30 min at 37°C, the suspensions were  
437 analyzed using M200 Pro plate reader (Tecan Trading AG, Switzerland) at green fluorescence (ex:  
438 488nm, em: 530nm) and red fluorescence (ex: 488nm, em: 630nm). Data were expressed as relative  
439 fluorescence units (RED/GREEN ratio). CCCP (Carbonyl cyanide *m*-chlorophenyl hydrazine) (Sigma-  
440 Aldrich, CAT No.:C2759) at a final concentration of 10  $\mu$ M, was used as a positive control for membrane  
441 potential disruption.

442

#### 443 **Turbidity-based growth inhibition assay**

444 Mid-log *M. bovis* BCG cultures (OD<sub>600nm</sub> 0.6) were diluted to OD<sub>600nm</sub> 0.05 in 7H9 media. Bacterial  
445 suspensions were then dispensed in a transparent U-bottom 96-well plate (Greiner-Bio, CAT No.:  
446 650180) (200  $\mu$ L/well), containing 2-fold serially diluted antibiotic. The plates were incubated for 5 days  
447 at 37 °C. Bacterial suspensions were manually resuspended before OD<sub>600</sub> was measured using  
448 M200Pro plate reader (Tecan Trading AG, Switzerland). The minimum inhibition concentration 50  
449 (MIC<sub>50</sub>), defined as the drug concentration that is required to inhibit 50% of bacterial growth (compared  
450 to drug-free control) was calculated.

451

#### 452 **RNA extraction, cDNA synthesis, and qRT-PCR**

453 Both *E. coli* and BCG cultures were treated with RNAprotect Cell Reagent (Qiagen, CAT No.:76526)  
454 before lysis. Treated bacterial cells were then centrifuged, and the pellet was resuspended in TE buffer  
455 with 20 mg/ml of lysozyme (Sigma-Aldrich, CAT No.:L7651) at room temperature for 20 minutes. BCG  
456 cultures had an additional disruption step using bead-beating before RNA extraction. The total RNA was  
457 isolated using the RNeasy®Mini Kit (Qiagen, CAT No.:74104), according to the manufacturer's protocol.  
458 Extracted total RNA was further treated with TURBO DNA-free™ kit (Invitrogen™, CAT No.: AM1907) to  
459 remove genomic DNA contamination, according to the manufacturer's protocol. RNA concentration and  
460 purity were determined using the NanoDrop 1000 Spectrophotometer™, and aliquots were stored at -

461 80°C. Complementary DNA (cDNA) from extracted RNA was obtained using the iScript™ cDNA  
462 Synthesis Kit (Bio-rad, CAT No.:1708890) according to the manufacturer's protocol. Relative mRNA  
463 abundance was then measured using the iTaq™ SYBR® Green Supermix (Bio-Rad, CAT No.:1725151)  
464 (refer to Table 2 for gene-specific primer sequences), and the 7500 Fast Real-Time PCR System (Applied  
465 Biosystems). Both the reaction mix and PCR cycling conditions followed the manufacturer's instructions.  
466 The relative abundance of each *E. coli* and mycobacterial gene target was determined using house-  
467 keeping genes *rssA* or *sigA*, respectively, to normalize mRNA levels. The mRNA level of each target gene  
468 in the KO strain was expressed relative to the mRNA level measured in WT.

469

#### 470 **Scanning electron microscopy (SEM)**

471 Mycobacteria grown in the Wayne model were harvested at the indicated time points and coated on  
472 polylysine-coated glass coverslips, and fixed in 2.5% glutaraldehyde in 0.1 M phosphate buffer for 1 h (pH  
473 7.4) at room temperature. The coverslips were then treated with 1% osmium tetroxide (Ted Pella Inc) at  
474 room temperature for 1 h, and then dehydrated through a graded ethanol series from 25% to 100% and  
475 critical point dried using a CPD 030 critical point dryer (Bal-Tec AG, Liechtenstein). The cell surfaces  
476 were coated with 15 nm of gold by sputter coating using a SCD005 high-vacuum sputter coater (Bal-Tec  
477 AG). The coated samples were examined with a field emission JSM-6701F Scanning Electron  
478 Microscope (JEOL Ltd., United States) at an acceleration voltage of 8 kV using the in-lens secondary  
479 electron detector.

480

#### 481 **Tandem Mass Tag (TMT) mass spectrometry**

482 Mycobacterial cultures was harvested at the indicated time points and washed twice with 1X PBS.  
483 Proteins were extracted using lysis buffer (8 M urea, 2 M thiourea, 4% CHAPS, 40mM DTT)  
484 supplemented with Halt protease inhibitor complete cocktail (Thermo Fisher) by bead beating (50 Hz for 3  
485 five-minute cycles, TissueLyzer II (Qiagen) with 0.1 mm silica beads). Bead beating chambers were  
486 chilled at 4 °C before and between cycles. Extracts were centrifuged at 14,000 g for 15min at 4 °C and  
487 the supernatant was collected. Overnight trichloroacetic acid/acetone precipitation was performed with 2D  
488 Clean-Up kits (GE Healthcare) as instructed by the manufacturer. Air-dried protein pellets were

489 resuspended in 10 mM triethylammonium bicarbonate (TEAB) buffer (pH 8.5) with 8M urea. Protein  
490 concentrations were determined by BCA assay (Thermo Science). Protein quality and quantities were  
491 checked by SDS-PAGE electrophoresis (12% polyacrylamide gels) and UV spectrometry (Nanodrop,  
492 Thermo Scientific). A total of 100 µg protein from each condition was subjected to in-solution trypsin  
493 digestion before labelling the resultant tryptic peptides using the TMT-6plex Isobaric Label Reagent Set  
494 (Thermo Scientific, Rockford, IL, USA) according to the manufacturer's protocol. The labeled samples  
495 were combined prior to fractionation using a high pH reverse phase HPLC on a Xbridge™ C18 column  
496 (4.6 × 250 mm, Waters, Milford, MA, USA) and subsequent analysis by LC-MS/MS.

497 The fractionated peptides were separated and analyzed using a Dionex Ultimate 3000 RSLCnano system  
498 coupled to Q Exactive tandem mass spectrometry (Thermo Fisher Scientific, MA, USA). Separation was  
499 performed on a Dionex EASY-Spray 75 µm × 10 cm column packed with PepMap C18 3 µm, 100 Å  
500 (Thermo Fisher Scientific) using solvent A (0.1% formic acid) and solvent B (0.1% formic acid in 100%  
501 ACN) at flow rate of 300 nL/min with a 60 min gradient. Peptides were then analyzed on the Q Exactive  
502 apparatus with the EASY nanospray source (Thermo Fisher Scientific) at an electrospray potential of  
503 1.5 kV. A full MS scan (350–1,600 m/z range) was acquired at a resolution of 70,000 and a maximum ion  
504 accumulation time of 100 ms. Dynamic exclusion was set as 30 s. The resolution of the higher energy  
505 collisional dissociation (HCD) spectra was set to 350,00. The automatic gain control (AGC) settings of the  
506 full MS scan and the MS2 scan were 5E6 and 2E5, respectively. The 10 most intense ions above the  
507 2,000 count threshold were selected for fragmentation in HCD, with a maximum ion accumulation time of  
508 120 ms. An isolation width of 2 m/z was used for MS2. Single and unassigned charged ions were  
509 excluded from MS/MS. For HCD, the normalized collision energy was set to 30. The underfill ratio was  
510 defined as 0.3%. Raw data files from the three technical replicates were processed and searched using  
511 Proteome Discoverer 2.1 (Thermo Fisher Scientific). The raw LC-MS/MS data files were loaded into  
512 Spectrum Files (default parameters set in Spectrum Selector) and TMT 6-plex was selected for the  
513 Reporter Ion Quantifier. The SEQUEST HT algorithm was then used for data searching to identify  
514 proteins using the following parameters; missed cleavage of two; dynamic modifications were oxidation  
515 (+15.995 Da) (M) and deamidation (+0.984 Da) (NQ). The static modifications were TMT-6plex

516 (+229.163 Da) (any N-terminus and K) and Carbamidomethyl (+57.021 Da) (C). The false discovery rate  
517 for protein identification was <1%. The Normalization mode was set based on total peptide amount.

518

### 519 **Cloning, expression and purification of recombinant HflX proteins**

520 *M. tuberculosis* (Mtb) *hflX* gene sequence encoding amino acids 1-435 was cloned into a pNIC-CH2  
521 expression vector with a His<sub>6</sub> tag at its C-terminus by Protein Production Platform (PPP), NTU. pNIC-CH2  
522 HflX was mutated with PCR-based mutagenesis to produce HflX AAY expression plasmid. *E. coli* HflX  
523 expression plasmid was also generated by PPP, NTU. Mtb HflX, Mtb HflX AAY, and *E.Coli* HflX  
524 constructs were transformed into BL21(DE3)- T1<sup>R</sup> competent cells (Sigma-Aldrich, CAT No.:B2935) for  
525 protein expression. For protein expression, 10 mL of overnight starter bacterial culture was added to 1L of  
526 LB media supplemented with kanamycin and chloramphenicol and cultured at 37°C on a shaker to OD<sub>600</sub>  
527 of 0.8 prior to addition of 0.5 mM IPTG and overnight incubation at 18°C. After centrifugation, the bacterial  
528 pellet was resuspended in cold lysis buffer (100 mM Na HEPES, pH 7.5, 500 mM NaCl, 10 mM imidazole,  
529 1 mM TCEP, and 10% glycerol), and lysed using LM20 microfluidizer with a pressure of 20,000 psi.  
530 Clarified lysates were collected after centrifugation for three-step purification, including nickel affinity  
531 chromatography, ion-exchange chromatography, and size exclusion chromatography. The protein was  
532 eluted in gel filtration buffer (20 mM HEPES, pH 7.5, 300 mM NaCl, 1 mM TCEP, 10% glycerol) and  
533 concentrated using Vivaspin turbo with a 10 kDa molecular mass cutoff concentrator (Sartorius) to a final  
534 concentration of 1 mg/mL. Protein quality and purity were assessed by SDS-PAGE, and the suspensions  
535 were stored at -80°C.

536

### 537 **Generation of anti-HflX monoclonal antibody**

538 BALB/c mice (females, 6 weeks old) were injected intraperitoneally with 25 µg of purified Mtb HflX protein  
539 as described above, mixed with incomplete Freund's adjuvant (Sigma-Aldrich, USA) in a 1:1 volumetric  
540 ratio for three cycles at 2-week intervals. A final booster immunization consisted of administering  
541 intravenously 25 µg of the same antigen without adjuvant. Three days later, the splenocytes from the  
542 euthanized BALB/c mice were obtained and fused with myeloma cells NS-1 using standard hybridoma  
543 methods (Köhler, 1975; Yokoyama, 2013). Screening of hybridoma cells and titer analysis were carried

544 out as described previously (Köhler, 1975; Yokoyama, 2013). The monoclonal antibody selected was  
545 confirmed to detect Mtb/BCG HflX in an ELISA assay and by dot blot, but was unable to detect HflX in  
546 Western blot, indicating that this antibody likely recognized a conformational epitope.

547

#### 548 **Immunoprecipitation and LC/MS**

549 Mid-log BCG WT and KO cultures (7H9) were harvested and the bacteria pellets were washed twice with  
550 1X PBS, before proceeding to protein extraction. Bacterial lysates were suspended in Pierce™ IP lysis  
551 buffer (Thermo Fisher Scientific, CAT No.:87787) and supplemented with 1X EDTA and 1X Halt Protease  
552 inhibitor cocktail (Thermo-Scientific, CAT No.:78440) and were lysed using bead beating (50 Hz for 3 five-  
553 minute cycles, TissueLyzer II (Qiagen) with 0.1 mm silica beads). 800 µg of lysates were then co-  
554 incubated with monoclonal anti-HflX that was pre-treated with Dynabeads Protein G (Thermo Fisher  
555 Scientific, CAT No.:1004D) for immunoprecipitation. The dynabeads were washed 3X with 1X PBS and  
556 0.05% Tween20. Co-IP elutes were extracted with 1X NUPAGE™ LDS sample buffer (Thermo Fisher  
557 Scientific, CAT No.: N0007). The proteins were separated on an 8–20% gradient SDS-PAGE and  
558 subjected to in-gel digestion. The peptides were separated and analyzed using a Dionex Ultimate 3000  
559 RSLCnano system coupled to a Q Exactive instrument as described in the Tandem Mass Tag (TMT)  
560 mass spectrometry section above. Raw data files were converted to mascot generic file format using  
561 Proteome Discoverer 1.4 (Thermo Fisher Scientific). The Mascot algorithm was then used for data  
562 searching to identify proteins. empAI value reported by Mascot was used for label free protein  
563 quantitation and proteins identified in the WT only (after minus the background proteins identified in the  
564 hflX KO strain) were shortlisted for further analysis.

565

#### 566 **GTPase/ATPase hydrolysis assay**

567 GTP/ATPase hydrolysis was quantified using malachite green phosphate assay kit (Sigma-Aldrich, CAT  
568 No.: MAK307) according to the manufacturer protocol. Briefly, a 300 µL of reaction mixture was prepared  
569 consisting of the respective purified proteins at a final concentration of 1 µM, 300 µM GTP or ATP and  
570 reaction buffer (50 mM Tris-HCl, pH 8.0, 200 mM NaCl, 1 mM DTT and 5 mM  $\text{MgCl}_2$ ). 80 µL of the  
571 reaction mixture were collected at 1 hr, 3 hr, and overnight respectively, and mixed with 20 µL of



572 malachite green phosphate assay reagent. After 5 minutes incubation at room temperature for 5 min,  
573 OD<sub>620nm</sub> was measured with a Tecan multimode microplate reader (Tecan Trading AG, Switzerland).

574

#### 575 **Isothermal titration calorimetry (ITC) assay**

576 ITC assay was performed to evaluate the direct interaction between HflX protein with ligands involved in  
577 GTPase hydrolysis, including GDP, GTP, and GMP-PNP. Both HflX protein and the ligands were  
578 prepared in (20 mM Hepes, pH 7.5 and 300 mM NaCl). Briefly, 800 µM of GDP, GTP or GMP-PNP was  
579 loaded into the syringe while 100 µM of Mtb HflX protein was loaded into the experimental cell. Titrations  
580 were performed at 25 °C consisting of an initial injection at 0.5 µL and 19 injections at 2 µL of GDP, GTP  
581 or GMP-PNP into Mtb HflX protein until saturation was reached. Thermodynamic data were analyzed with  
582 a single-site fitting model using MicroCal PEAQ-ITC analysis software provided by the manufacturer.

583

#### 584 **Ribo-sequencing**

585 *Extraction of RNA and ribosomes*- Mycobacterial cultures grown in the Wayne model were harvested at  
586 day 8 and treated with 100 µg/mL Chloramphenicol (Sigma Aldrich, CAT No.: C0378) for 3 min before  
587 centrifugation at 4,500 g for 10min at 4 °C followed by one wash with chilled 1X polysome buffer (20mM  
588 Tris HCL, 100mM NaCl, 5mM MgCl<sub>2</sub>, 100 µg/mL Chloramphenicol). Cell pellets were resuspended in ice-  
589 cold lysis buffer (1X polysome buffer, 1% Triton X 100, 1mM DTT, 20 U/mL Turbo DNase, 0.1% NP40,  
590 100 µg/mL Chloramphenicol) and flash frozen in liquid nitrogen. The frozen cells were pulverized using  
591 Cell Crusher tissue pulverizer (Cell Crusher, CAT No.: 607KSL) according to the manufacturer's protocol.  
592 The grinding jar was pre-chilled in liquid nitrogen. The extracts were centrifuged at 14,000 g for 20min at  
593 4 °C and the supernatant was collected. RNA concentration was determined by Qubit<sup>TM</sup> RNA HS assay  
594 kit (Thermo Fisher, CAT No.: Q32852).

595 *Ribosome profiling*- Pulverized cells were thawed and the soluble cytoplasmic fraction was isolated by  
596 centrifugation at top speed for 20 min at 4 °C (Oh, 2011). Supernatant was collected and the clarified  
597 lysates were digested with RNase I for 1h at room temperature. Digestion was stopped with SuperaseIN  
598 and monosomes purified by size exclusion chromatography on MicroSpin S-400 HR columns (GE  
599 Healthcare) as described (Shamimuzzaman, 2018). Size selection of footprints with length 15-40 nt was



600 performed by electrophoresis on 15% TBE-urea gels. 3' termini of ribosome footprints were  
601 dephosphorylated with T4 polynucleotide kinase. Illumina ready RIBO-seq libraries were prepared using  
602 SMARTer smRNA kit (TakaraBio). Library concentrations were measured by Qubit fluorometer and their  
603 quality assessed on a Agilent 2100 bioanalyzer. RIBO-seq libraries were sequenced on a Illumina  
604 Novaseq 6000 sequencer.

605 *RNA-sequencing-* To obtain matched RNA-seq libraries, total RNA was purified from an aliquot of cell  
606 lysate, rRNA was depleted using RIBO-Minus transcriptome isolation kit (Invitrogen) following  
607 manufacturer's instructions. mRNA fragmentation was conducted for 25 min at 94 °C to generate RNA  
608 fragments of similar sizes as those of the ribosome footprints. SMARTer smRNA kit (TakaraBio) was  
609 used to generate Illumina ready RNA-seq libraries. Library concentrations were measured by Qubit  
610 fluorometer and their quality assessed on a Agilent 2100 bioanalyzer. RNA-seq libraries were sequenced  
611 on a Illumina Novaseq 6000 sequencer.

612

### 613 **Loebel nutrient starvation model**

614 The starvation model follows a previously described method (Betts, 2002; Loebel, 1933). Briefly, mid-log  
615 phase ( $OD_{600nm}$  0.6) *M. bovis* BCG cultures grown in 7H9 were washed thrice with sterile DPBST (1 X  
616 PBS supplemented with 100 mg/L  $CaCl_2$  and 100 mg/L  $MgCl_2 \cdot 6H_2O$  and 0.05% Tween 80). The pellet  
617 was then resuspended in 50 mL sterile at an  $OD_{600nm}$  of 0.1 within a one-liter roller bottle (Corning® Roller  
618 Bottles, Tissue Culture Treated, 490 cm<sup>2</sup>, cap plug seal, CAT No.: CLS430195-40EA). The cultures were  
619 then incubated at 37 °C on a rolling platform for 2 weeks. At the indicated time points (days 0, 6, 9, 14),  
620 turbidity was measured at  $OD_{600nm}$ , and CFU were enumerated onto 7H11 agar plates.

621

### 622 **THP-1 macrophage infection assay**

623 THP-1 cells (American Type Culture Collection) were grown in RPMI 1640 (Gibco CAT No.: 22400-15)  
624 supplemented with 10% fetal bovine serum (Gibco CAT No.: 10270-106), 0.01 mM sodium pyruvate  
625 (Gibco CAT No.: 11360-070), 1% Glutamax (Gibco CAT No.: 35050-061) and 0.5 μM Beta-  
626 mercaptoethanol (Gibco CAT No.: 21985-023). THP-1 were seeded in 24-wells plate at  $5 \times 10^4$  cells/well.  
627 THP-1 cells differentiated with 100 ng/mL phorbol-12-myristate 13-acetate (PMA) (Sigma-Aldrich, CAT

628 No.:79346) were allowed to adhere for 24 hours before infection. Dispersed bacilli were incubated with  
629 differentiated THP-1 cells at a multiplicity of infection (MOI) of 2 for 1h at 37°C, 5% CO<sub>2</sub>. The cells were  
630 then washed thoroughly twice with pre-warmed PBS and then incubated for 1 to 5 days at 37 °C and 5%  
631 CO<sub>2</sub>. After incubation, cells were lysed, and bacteria were harvested and plated on 7H11 agar plate for  
632 CFU enumeration 3 weeks later.

633

### 634 **Computational modeling**

635 Web-based protein modeling platform Phyre 2.0 was used (Kelley, 2015). The Mtb H37Rv HflX primary  
636 protein sequence was obtained from the NCBI Gene database and entered into the Phyre 2.0 with the  
637 modeling mode set to “Intensive”. Homology modeling uses the *E. coli* HflX crystal structure (PDB entry:  
638 5ADY) as a template to produce the model. Model homology was individually assessed based upon the  
639 parameters set for each platform. Phyre 2.0 utilizes a Confidence score based on HHsearch, which uses  
640 a profile hidden Markov model to assess the quality of model alignment with the template (Soding, 2005).

641

### 642 **Statistical analysis**

643 Statistical analyses were generated from Prism 7.0 (GraphPad, USA) and tests used are indicated in the  
644 figure legends. One-way and two-way ANOVA were conducted on experiments comparing across  
645 different groups under single and multiple conditions, respectively, with Bonferroni correction as *post-*  
646 *hoc* test. Results with *p*-values <0.05 were defined as statistically significant.

647

648

649

650

651

652

653 **Acknowledgements**

654 This work was supported by a grant from the Ministry of Education (Singapore) allocated to SA. We would  
655 like to thank the Antibody Core Facility at the Life Sciences Institute, for their assistance in generating the  
656 anti-HflX monoclonal antibody; and TB-SEQ, Inc (Palo Alto, USA) for performing library preparation,  
657 ribosome sequencing and bioinformatics services. We would also like to thank Dr. Rohan Williams from  
658 SCELSE (NUS) for his insightful comments on data analyzing.

659

660 **Conflict of interest declaration**

661 The authors declare that they have no conflict of interest

662

663 **Author contributions**

664 -NGAN Jie Yin Grace, PAUNOOTI Swathi, PETHE Kevin, SZE Siu Kwan, LESCAR Julien, and ALONSO  
665 Sylvie designed the experiments, and analyzed the data.

666 -NGAN Jie Yin Grace, PAUNOOTI Swathi, MENG Wei, NG Sze Wai, JAAFA Muhammad Taufiq, JIA  
667 Huan, CHO Su Lei Sharol, LIM Jieling, KOH Hui Qi Vanessa, ABDUL GHANI Noradibah, performed the  
668 experiments.

669 -TSE Wilford, NGAN So Fong Cam, analyzed data.

670 -NGAN Jie Yin Grace, ALONSO Sylvie wrote the manuscript.

671

672 **Conflict of Interests**

673 The authors declare that they have no conflict of interest.

674

675

676

677

678 **References**

- 679  
680 Andini N, Nash, KA. (2006) Intrinsic macrolide resistance of the Mycobacterium tuberculosis complex is inducible. *Antimicrob*  
681 *Agents Chemother* **50**: 2560-2562
- 682  
683 Andreu N, Gibert, I. (2008) Cell population heterogeneity in Mycobacterium tuberculosis H37Rv. *Tuberculosis (Edinb)* **88**: 553-559
- 684  
685 Andries K, Verhasselt, P., Guillemont, J., Göhlmann, HWH., Neefs, JM., Winkler, H., Gestel, JV., Timmerman, P., Zhu, M., Lee, E.,  
686 Williams, P., de Chaffoy, D., Huitric, E., Hoffner, S., Cambau, E., Truffot-Pernot, C., Lounis, N., Jarlier, V. (2005) A diarylquinoline  
687 drug active on the ATP synthase of Mycobacterium tuberculosis. *Science* **307**: 223-227
- 688  
689 Azad A, Sirakova, TD., Fernandes, ND., Kolattukudy, PE. (1997) Gene knockout reveals a novel gene cluster for the synthesis of a  
690 class of cell wall lipids unique to pathogenic mycobacteria. *J Biol Chem* **272**: 16741-16745
- 691  
692 Bagchi G, Chauhan, S., Sharma, D., Tyagi, JS. (2005) Transcription and autoregulation of the Rv3134c-devR-devS operon of  
693 Mycobacterium tuberculosis *Microbiol* **151**: 4045-4053
- 694  
695 Bardarov S, Bardarov, S., Pavelka, MS., Sambandamurthy, V., Larsen, M., Tufariello, JA., Chan, J., Hatfull, G., Jacobs, WR.  
696 (2002) Specialized transduction: an efficient method for generating marked and unmarked targeted gene disruptions in  
697 Mycobacterium tuberculosis, M. bovis BCG and M. smegmatis. *Microbiology* **148**: 3007-3017
- 698  
699 Basu A, Yap, MNF. (2017) Disassembly of the Staphylococcus aureus hibernating 100S ribosome by an evolutionarily conserved  
700 GTPase. *PNAS* **114**: 8165-8173
- 701  
702 Bennison D, Irving, SE., Corrigan, RM. (2019) The Impact of the Stringent Response on TRAFAC GTPases and Prokaryotic  
703 Ribosome Assembly. *Cells* **8**: 1313
- 704  
705 Betts J, Lukey, PT., Robb, LC., McAdam, RA., Duncan, K. (2002) Evaluation of a nutrient starvation model of Mycobacterium  
706 tuberculosis persistence by gene and protein expression profiling. *Mol Microbiol* **43**: 717-731
- 707  
708 Binder A, Adjemian, J., Olivier, KN., Prevots, DR. (2013) Epidemiology of nontuberculous mycobacterial infections and associated  
709 chronic macrolide use among persons with cystic fibrosis. *Am J Respir Crit Care Med* **188**: 807-812
- 710  
711 Bloom B, Murray, CJ. (1992) Tuberculosis: commentary on a reemergent killer. *Science* **257**: 1055-1064
- 712  
713 Boon C, Dick, T. (2002) Mycobacterium bovis BCG response regulator essential for hypoxic dormancy. *J Bacteriol* **184**: 6760-6767
- 714  
715 Boshoff H, Myers, TG., Copp, BR., McNeil, MR., Wilson, MA., Barry, CE 3rd. (2004) The transcriptional responses of  
716 Mycobacterium tuberculosis to inhibitors of metabolism: novel insights into drug mechanisms of action. *J Biol Chem* **279**: 40174-  
717 40184
- 718  
719 Bourne H, Sanders, DA., McCormick, F. (1990) The GTPase superfamily: a conserved switch for diverse cell functions. *Nature* **348**:  
720 125-132
- 721  
722 Bretl D, Demetriadou, C., Zahrt, TC. (2011) Adaptation to Environmental Stimuli within the Host: Two-Component Signal  
723 Transduction Systems of Mycobacterium tuberculosis. *Microbiol Mol Biol Rev* **75**: 566-582
- 724  
725 Britton R (2009) Role of GTPases in bacterial ribosome assembly. *Annu Rev Microbiol* **63**: 155-176
- 726  
727 Britton R, Chen, SM., Wallis, D., Koeuth, T., Powell, BS., Shaffer, LG., Largaespada, D., Jenkins, NA., Copeland, NG., Court, DL.,  
728 Lupski, JR. (2000) Isolation and preliminary characterization of the human and mouse homologues of the bacterial cell cycle gene  
729 era. *Genomics* **67**: 78-82
- 730  
731 Britton R, Powell, BS., Dasgupta, S., Sun, Q., Margolin, W., Lupski, JR., Court, DL. (1998) Cell cycle arrest in Era GTPase mutants:  
732 a potential growth rate-regulated checkpoint in Escherichia coli. *Mol Microbiol* **27**: 739-750

- 733  
734 Burian J, Ramón-García, S., Sweet, J., Gómez-Velasco, A., Av-Gay, Y., Thompso, CJ. (2012) The Mycobacterial Transcriptional  
735 Regulator whiB7 Gene Links Redox Homeostasis and Intrinsic Antibiotic Resistance. *J Bio Chem* **287**: 299-310
- 736  
737 Buriánková K, Doucet-Populaire, F., Dorson, O., Gondran, A., Ghnassia, JC., Weiser, J., Pernodet, JL. (2004) Molecular basis of  
738 intrinsic macrolide resistance in the Mycobacterium tuberculosis complex. *Antimicrob Agents Chemother* **48**: 143-150
- 739  
740 Caldon C, March, PE. (2003) Function of the universally conserved bacterial GTPases. *Curr Opin Microbiol* **6**: 135-139
- 741  
742 Campbell T, Brown, ED. (2008) Genetic interaction screens with ordered overexpression and deletion clone sets implicate the  
743 Escherichia coli GTPase YjeQ in late ribosome biogenesis. *J Bacteriol* **190**: 2537-2545
- 744  
745 Carreau A, El Hafny-Rahbi, B., Matejuk, A., Grillon, C., Kieda, C. (2011) Why is the partial oxygen pressure of human tissues a  
746 crucial parameter? Small molecules and hypoxia. *J Cell Mol Med* **15**: 1239-1253
- 747  
748 Cladière L, Hamze, K., Madec, E., Levnikov, VM., Wilkinson, AJ., Holland, IB., Séror, SJ. (2006) The GTPase, CpgA(YloQ), a  
749 putative translation factor, is implicated in morphogenesis in Bacillus subtilis. *Mol Genet Genomics* **275**: 409-420
- 750  
751 Coatham ML, Brandon, H. E., Fischer, J. J., Schümmer, T. & Wieden, H.-J. (2016) The conserved GTPase HflX is a ribosome  
752 splitting factor that binds to the E-site of the bacterial ribosome. *Nucleic Acids Research* **44**: 1952-1961
- 753  
754 Dannenberg AJ (1993) Immunopathogenesis of pulmonary tuberculosis. *Hosp Pract (Off Ed)* **28**: 51-58
- 755  
756 Davies J, Davies, D. (2010) Origins and evolution of antibiotic resistance. *Microbiol Mol Biol Rev* **74**: 417-433
- 757  
758 Dey S, Biswas, C., Sengupta, J. (2018) The universally conserved GTPase HflX is an RNA helicase that restores heat-damaged  
759 Escherichia coli ribosomes. *J Cell Bio* **217**: 2519–2529
- 760  
761 Dheda KB, H., Huggett, JF., Johnson, MA., Zumla, A., Rook, GA. (2005) Lung remodeling in pulmonary tuberculosis. *J Infect Dis*  
762 **192**: 1201-1205
- 763  
764 Dutta D, Bandyopadhyay, K., Datta, A. B., Sardesai, A. A. & Parrack, P. (2009) Properties of HflX, an enigmatic protein from  
765 Escherichia coli. *J Bacteriol* **191**: 2307-2314
- 766  
767 Dutta N, Mehra, S., Didier, PJ., Roy, CJ., Doyle, LA., Alvarez, X., Ratterree, M., Be, NA., Lamichhane, G., Jain, Sk., Lacey, MR.,  
768 Lackner, AA., Kaushal, D. (2010) Genetic requirements for the survival of tubercle bacilli in primates. *J Infect Dis* **201**: 1743-1752
- 769  
770 Dye C, Scheele, S., Dolin, P., Pathania, V., Raviglione, MC. (1999) Consensus statement. Global burden of tuberculosis: estimated  
771 incidence, prevalence, and mortality by country. WHO Global Surveillance and Monitoring Project. *JAMA* **282**: 677-686
- 772  
773 El-Sharoud W (2004) Ribosome inactivation for preservation: concepts and reservations. *Sci Prog* **87**: 137-152
- 774  
775 Fischer J, Coatham, ML., Bear, SE., Brandon, HE., De Laurentiis, EI., Shields, MJ., Wieden, H. (2012) The ribosome modulates the  
776 structural dynamics of the conserved GTPase HflX and triggers tight nucleotide binding. *J Biochimie* **94**: 1647-1659
- 777  
778 Foti J, Persky, NS., Ferullo, DJ., Lovett, ST. (2007) Chromosome segregation control by Escherichia coli ObgE GTPase. *Mol*  
779 *Microbiol* **65**: 569–581
- 780  
781 Franzblau S, DeGroot, MA., Sang, HC., Andries, K., Nuermberger, E., Orme, IM., Mdluli, K., Angulo-Barturen, I., Dick, T., Dartois,  
782 V., Lenaerts, AJ. (2012) Comprehensive analysis of methods used for the evaluation of compounds against Mycobacterium  
783 tuberculosis. *Tuberculosis* **92**: 453-488
- 784  
785 FU L, Tai, SC. (2009) The Differential Gene Expression Pattern of Mycobacterium tuberculosis in Response to Capreomycin and  
786 PA-824 versus First-Line TB Drugs Reveals Stress- and PE/PPE-Related Drug Targets. *Int J Micro* **2009**: 1-9

- 787  
788 Gautam U, Sikri, K., Vashist, A., Singh, V., Tyagi, JS. (2014) Essentiality of DevR/DosR interaction with SigA for the dormancy  
789 survival program in Mycobacterium tuberculosis. *J Bacteriol* **196**: 790-799
- 790  
791 Gohara D, Yap, MF. (2018) Survival of the drowsiest: the hibernating 100S ribosome in bacterial stress management. *Curr Genet*  
792 **64**: 753-760
- 793  
794 Gold B, Nathan, C. (2017) Targeting Phenotypically Tolerant Mycobacterium tuberculosis. *Microbiol Spectr* **5**: 10.1128
- 795  
796 Gollop N, March, PE. (1991) A GTP-binding protein (Era) has an essential role in growth rate and cell cycle control in Escherichia  
797 coli. *J Bacteriol* **173**: 2265-2270
- 798  
799 Gomez J, McKinney, JD. (2004) M. tuberculosis persistence, latency, and drug tolerance. . *Tuberculosis (Edinb)* **84**: 29-44
- 800  
801 Haagsma A, Podasca, I., Koul, A., Andries, K., Guillemont, J., Lill, H., Bald, D. (2011) Probing the Interaction of the Diarylquinoline  
802 TMC207 with Its Target Mycobacterial ATP Synthase. *PLoS ONE* **6**: e23575
- 803  
804 Hartkoorn R, Sala, C., Neres, J., Pojer, F., Magnet, S., Mukherjee, R., Uplekar, S., Boy-Röttger, S., Altmann, KH., Cole, ST. (2012)  
805 Towards a new tuberculosis drug: pyridomycin – nature's isoniazid. *EMBO Mol Med* **4**: 1032-1042
- 806  
807 Hu Y, Butcher, PD., Sole, K., Mitchison, DA., Coates, AR. (1998) Protein synthesis is shutdown in dormant Mycobacterium  
808 tuberculosis and is reversed by oxygen or heat shock. . *FEMS Microbiol Lett* **158**: 139145
- 809  
810 Iacobino A, Piccaro, G., Giannoni, F., Mustazzolu, A., Fattorini, L. (2017) Mycobacterium tuberculosis Is Selectively Killed by  
811 Rifampin and Rifapentine in Hypoxia at Neutral pH. . *Antimicrob Agents Chemother* **61**: e02296-02316
- 812  
813 Iacobino A, Piccaro, G., Giannoni, F., Mustazzolu, A., Fattorini, L. (2016) Activity of drugs against dormant Mycobacterium  
814 tuberculosis. . *Int J Mycobacteriol* **5**: S94–S95
- 815  
816 Ignatov D, Salina, EG., Fursov, MV., Skvortsov, TA., Azhikina, TL., Kaprelyants, AS. (2015) Dormant non-culturable Mycobacterium  
817 tuberculosis retains stable low-abundant mRNA. *BMC Genomics* **16**: 954-967
- 818  
819 Jackson M (2014) The Mycobacterial Cell Envelope—Lipids. *Cold Spring Harb Perspect Med* **4**: a021105
- 820  
821 Jackson M, Stadthagen, G., Gicquel, B. (2007) Long-chain multiple methyl-branched fatty acid-containing lipids of Mycobacterium  
822 tuberculosis: Biosynthesis, transport, regulation and biological activities. *Tuberculosis* **87**: 78-86
- 823  
824 Jakkala K, Ajitkumar, P. (2019) Hypoxic Non-replicating Persistent Mycobacterium tuberculosis Develops Thickened Outer Layer  
825 That Helps in Restricting Rifampicin Entry. *Front Microbiol* **10**: 2339
- 826  
827 Kelley L, Mezulis, S., Yates, CM., Wass, MN., Sternberg, MJE. (2015) The Phyre2 web portal for protein modeling, prediction and  
828 analysis. *Nat Protocols* **10**: 845-858
- 829  
830 Kendall S, Movahedzadeh, F., Rison, SC., Wernisch, L., Parish, T., Duncan, K., Betts, JC., Stoker, NG. (2004) The Mycobacterium  
831 tuberculosis dosRS two-component system is induced by multiple stresses. *Tuberculosis (Edinb)* **84**: 247-255
- 832  
833 Kester J, Fortune, SM. (2014) Persists and beyond: mechanisms of phenotypic drug resistance and drug tolerance in bacteria. .  
834 *Crit Rev Biochem Mol Biol* **49**: 91-101
- 835  
836 Köhler G, Milstein, C. (1975) Continuous cultures of fused cells secreting antibody of predefined specificity. . *Nature* **256**: 495–497
- 837  
838 Koul A, Vranckx, K., Dhar, N., Göhlmann, HWH., Özdemir, E., Neefs, JM., Schulz, M., Lu, P., Mørtz, E., McKinney, JD., Andries, K.,  
839 Bald, D. (2014) Delayed bactericidal response of Mycobacterium tuberculosis to bedaquiline involves remodelling of bacterial  
840 metabolism. *Nat Comm* **5**

- 841  
842 Laalami S, Grentzmann, G., Bremaud, L. & Cenatiempo, Y. (1996) Messenger RNA translation in prokaryotes: GTPase centers  
843 associated with translational factors. *Biochimie* **78**: 577-589
- 844  
845 Lakshminarayana S, Tan, BH., Ho, PC., Manjunatha, UH., Dartois, V., Dick, T., Rao, SPS. (2015) Comprehensive physicochemical,  
846 pharmacokinetic and activity profiling of anti-TB agents. *Journal of Antimicrobial Chemotherapy* **70**: 857-867
- 847  
848 Leipe D, Wolf, YI., Koonin, EV., Aravind, L. (2002) Classification and evolution of P-loop GTPases and related ATPases. *J Mol Biol*  
849 **317**: 41-72
- 850  
851 Leistikow R, Morton, RA., Bartek, IL., Frimpong, I., Wagner, K., Voskuil, MI. (2010) The Mycobacterium tuberculosis DosR Regulon  
852 Assists in Metabolic Homeostasis and Enables Rapid Recovery from Nonrespiring Dormancy. *J Bacteriol* **192**: 1662-1670
- 853  
854 Li X, Sun, Q., Jiang, C., Yang, K., Hung, LW., Zhang, J, Sacchettini, JC. (2015) Structure of Ribosomal Silencing Factor Bound to  
855 Mycobacterium tuberculosis Ribosome. *Structure* **23**: 1858-1865
- 856  
857 Lin W, Sessions, PFD., Teoh, GHK., Mohamed, ANN., Zhu, OY., Koh, VHQ., Lay, MTA., Dedon, PC., Hibberd, ML., Alonso, S.  
858 (2016) Transcriptional Profiling of Mycobacterium tuberculosis Exposed to In Vitro Lysosomal Stress. *Infection and Immunity* **84**:  
859 2505-2523
- 860  
861 Liu S, Shah, SJ., Wilmes, LJ., Feiner, J., Kodibagkar, VD., Wendland, MF., Mason, RP., Hylton, N., Hopf, HW., Rollins, MD. (2011)  
862 Quantitative tissue oxygen measurement in multiple organs using 19F MRI in a rat model. *Preclinical and Clinical Imaging* **66**: 1722-  
863 1730
- 864  
865 Loebel R, Shorr, E., Richardson, HB. (1933) The Influence of Foodstuffs upon the Respiratory Metabolism and Growth of Human  
866 Tubercle Bacilli. *J Bacteriol* **26**: 139-166
- 867  
868 Manabe Y, Bishai, WR. (2006) Latent Mycobacterium tuberculosis-persistence, patience, and winning by waiting. . *Nat Med* **6**:  
869 1327-1329
- 870  
871 Manjunatha U, Boshoff, HI., Barry, CE. (2009) The mechanism of action of PA-824: Novel insights from transcriptional profiling.  
872 *Commun Integr Biol* **2**: 215-218
- 873  
874 Maxson S, Schutze, GE., Jacobs, RF. (1994) Mycobacterium abscessus osteomyelitis: treatment with clarithromycin. *Infect Dis Clin*  
875 *Pract* **3**: 203-205
- 876  
877 McCune R, Feldmann, FM., Lambert, HP., McDermott, W. (1966) Microbial persistence. I. The capacity of tubercle bacilli to survive  
878 sterilization in mouse tissues. *J Exp Med* **123**: 445-468
- 879  
880 McCune R, Tompsett, R. (1956) Fate of Mycobacterium tuberculosis in mouse tissues as determined by the microbial enumeration  
881 technique. I. The persistence of drug-susceptible tubercle bacilli in the tissues despite prolonged antimicrobial therapy. *J Exp Med*  
882 **104**: 737-762
- 883  
884 Miranda-CasoLuengo A, Staunton, PM., Dinan, AM., Lohan, AJ., Loftus, BJ. (2016) Functional characterization of the  
885 Mycobacterium abscessus genome coupled with condition specific transcriptomics reveals conserved molecular strategies for host  
886 adaptation and persistence. *BMC Genomics* **17**: 553
- 887  
888 Mishra S, Ahmed, T., Tyagi, A., Shi, J., Bhushan, S. (2018) Structures of Mycobacterium smegmatis 70S ribosomes in complex with  
889 HPF, tmRNA, and P-tRNA. *Sci Rep* **8**: 13587
- 890  
891 Morris R, Nguyen, L., Gatfield, J., Visconti, K., Nguyen, K., Schnappinger, D., Ehrst, S., Liu, Y., Heifets, L., Pieters, J., Schoolnik, G.,  
892 Thompson, CJ. (2005) Ancestral antibiotic resistance in Mycobacterium tuberculosis. *Proc Natl Acad Sci U S A* **102**: 12200-12205
- 893  
894 Mushatt D, Witzig, RS. (1995) Successful treatment of Mycobacterium abscessus infections with multidrug regimens containing  
895 clarithromycin. *Clin Infect Dis* **20**: 1441-1442



- 896  
897 Nicolle D, Fremont, C., Pichon, X., Bouchot, A., Maillet, I., Ryffel, B., Quesniaux, VJF. (2004) Long-term control of Mycobacterium  
898 bovis BCG infection in the absence of Toll-like receptors (TLRs): investigation of TLR2-, TLR6-, or TLR2-TLR4-deficient mice. *Infect*  
899 *Immun* **72**: 6994–7004
- 900  
901 Nuernberger E, Yoshimatsu, T., Tyagi, S., O'Brien, RJ., Vernon, AN., Chaisson, RE., Bishai, WR., Grosset, JH. (2004)  
902 Moxifloxacin-containing Regimen Greatly Reduces Time to Culture Conversion in Murine Tuberculosis. *Am J Respir Crit Care Med*  
903 **69**: 421-426
- 904  
905 Oh E, Becker, AH., Sandikci, A., Huber, D., Chaba, R., Glöge, F., Nichols, RJ., Typas, A., Gross, CA., Kramer, G., Weissman, JS.,  
906 Bukau, B. (2011) Selective ribosome profiling reveals the cotranslational chaperone action of trigger factor in vivo. *Cell* **147**: 1295-  
907 1308
- 908  
909 Orme I, Basaraba, RJ. (2014) The formation of the granuloma in tuberculosis infection. *Semin Immunol* **26**: 601-609
- 910  
911 Park H, Guinn, KM., Harrell, MI., Liao, RL., Voskuil, MI., Tompa, M., Schoolnik, GK., Sherman, DR. (2003) Rv3133c/dosR is a  
912 transcription factor that mediates the hypoxic response of Mycobacterium tuberculosis. *Mol Microbiol* **48**: 833-843
- 913  
914 Parrish N, Dick, JD., Bishai, WR.. (1998) Mechanisms of latency in Mycobacterium tuberculosis. *Trends Microbiol* **6**: 107-112
- 915  
916 Piccaro G, Poce, G., Biava, M., Giannoni, F., Fattorini, L. (2015) Activity of lipophilic and hydrophilic drugs against dormant and  
917 replicating Mycobacterium tuberculosis. *J Antibiot (Tokyo)* **68**: 711-714
- 918  
919 Rao S, Alonso, S., Rand, L., Dick, T., Pethe K. (2007) The protonmotive force is required for maintaining ATP homeostasis and  
920 viability of hypoxic, nonreplicating Mycobacterium tuberculosis. *Proc Natl Acad Sci U S A* **105** 11945-11950
- 921  
922 Roberts D, Liao, RLP., Wisedchaisri, G., Hol, WGJ., Sherman, DR. (2004) Two Sensor Kinases Contribute to the Hypoxic Response  
923 of Mycobacterium tuberculosis\*. *J Bio Chem* **279**: 3082-23087
- 924  
925 Rudra P, Hurst-Hess, KR., Cotten, KL., Miranda, Ap., Ghosh, P. (2020) Mycobacterial HflX is a ribosome splitting factor that mediates  
926 antibiotic resistance. *PNAS* **117**: 629-634
- 927  
928 Russell D (2007) Who puts the tubercle in tuberculosis? *Nat Rev Microbiol* **5**: 39-47
- 929  
930 Rustad T, Sherrid, AM., Minch, KJ., Sherman, DR. (2009) Hypoxia: a window into Mycobacterium tuberculosis latency. *Cell*  
931 *Microbiol* **11**: 1151-1159
- 932  
933 Saini D, Malhotra, V., Dey, D., Pant, NH., Das, TK., Tyagi, JS. (2004) DevR–DevS is a bona fide two-component system of  
934 Mycobacterium tuberculosis that is hypoxia-responsive in the absence of the DNA-binding domain of DevR. *Microbiol* **150**: 865-875
- 935  
936 Sassetti C, Boyd, DH., Rubin, EJ. (2003) Genes Required for Mycobacterial Growth Defined by High Density Mutagenesis. *Mol*  
937 *Microbiol* **48**: 77-84
- 938  
939 Sawyer E, Grabowska, AD., Cortes, T. (2018) Translational regulation in mycobacteria and its implications for pathogenicity. *Nucleic*  
940 *Acids Res* **46**: 6950–6961
- 941  
942 Schnappinger D, Ehrt, S., Voskuil, MI., Liu, Y., Mangan, JA., Monahan, IM., Dolganov, G., Efron, B., Butcher, PD., Nathan, C.,  
943 Schoolnik, GK. (2003) Transcriptional Adaptation of Mycobacterium tuberculosis within Macrophages: Insights into the Phagosomal  
944 Environment. *J Exp Med* **198**: 693–704
- 945  
946 Shamimuzzaman M, Vodkin, L. (2018) Ribosome profiling reveals changes in translational status of soybean transcripts during  
947 immature cotyledon development. *PLoS One* **13**: e0194596
- 948  
949 Sharma S, Tyagi, JS. (2016) Mycobacterium tuberculosis DevR/DosR Dormancy Regulator Activation Mechanism: Dispensability of  
950 Phosphorylation, Cooperativity and Essentiality of  $\alpha$ 10 Helix. *PLoS One* **11**: e0160723



- 951  
952 Sherman D, Voskuil, M., Schnappinger, D., Liao, R., Harrell, MI., Schoolnik, GK. (2001) Regulation of the Mycobacterium  
953 tuberculosis hypoxic response gene encoding alpha -crystallin *Proc Natl Acad Sci U S A* **98**: 7534–7539
- 954  
955 Sherrid A, Rustad, TR., Cangelosi, GA., Sherman, DR. (2010) Characterization of a Clp Protease Gene Regulator and the  
956 Reaeration Response in Mycobacterium tuberculosis. . *PLoS ONE* **5**: e11622
- 957  
958 Shi L, Sohaskey, CD., Kana, BD., Dawes, S., North, RJ., Mizrahi, V., Gennaro, ML. (2005) Changes in energy metabolism of  
959 Mycobacterium tuberculosis in mouse lung and under in vitro conditions affecting aerobic respiration. *Proc Natl Acad Sci U S A* **102**:  
960 15629–15634
- 961  
962 Shleeva M, Kudykina, YK., Vostroknutova, GN., Suzina, NE., Mulyukin, AL., Kaprelyants, AS. (2011) Dormant ovoid cells of  
963 Mycobacterium tuberculosis are formed in response to gradual external acidification. . *Tuberculosis (Edinb)* **91**: 146-154
- 964  
965 Soding J (2005) Protein homology detection by HMM-HMM comparison. *Bioinformatics* **21**: 951-960
- 966  
967 Sousa E, Tuckerman, JR., Gonzalez, G., Gilles-Gonzalez, MA. (2007) DosT and DevS are oxygen-switched kinases in  
968 Mycobacterium tuberculosis. *Protein Sci* **16**: 1708–1719
- 969  
970 Sprang S (1997) G Protein Mechanisms: Insights From Structural Analysis. *Annu Rev Biochem* **66**: 639-678
- 971  
972 Starosta A, Lassak, J., Jung, K., Wilson, DN. (2014) The bacterial translation stress response. *FEMS Microbiol Rev* **38**: 1172–1201
- 973  
974 Stothard P (2000) The sequence manipulation suite: JavaScript programs for analyzing and formatting protein and DNA sequences.  
975 . *Biotechniques* **28**: 1102-1104
- 976  
977 Stover C, de la Cruz, VF., Fuerst, TR., Burlein, JE., Benson, LA., Bennett, LT., Bansal, GP., Young, JF., Lee, MH., Hatfull, GF.  
978 (1991) New use of BCG for recombinant vaccines. *Nature* **351**: 456-460
- 979  
980 Tomasz A, Albino, A., Zanati, E. (1970) Multiple antibiotic resistance in a bacterium with suppressed autolytic system. *Nature* **227**:  
981 138–140
- 982  
983 Trauner A, Loughheed, KEA., Bennett, MH., Hingley-Wilson, SM., Williams, HD. (2012) The Dormancy Regulator DosR Controls  
984 Ribosome Stability in Hypoxic Mycobacteria. *J Bio Chem* **287**: 24053-24063
- 985  
986 Vaara M (1992) Agents that increase the permeability of the outer membrane. . *Microbiol Rev* **56**: 395–411
- 987  
988 Velayati A, Farnia, P., Masjedi, MR., Zhavnerko, GK., Merza, MA., Ghanavei, J. (2011) Sequential adaptation in latent tuberculosis  
989 bacilli: observation by atomic force microscopy (AFM). *Int J Clin Exp Med* **4**: 193-199
- 990  
991 Verstraeten N, Fauvart, M., Verse'es, W., Michiels, J. (2011) The Universally Conserved Prokaryotic GTPases. *Microbiol Mol Biol*  
992 *Rev* **75**: 507–542
- 993  
994 Wada A, Igarashi, K., Yoshimura, S., Aimoto, S., Ishihama, A. (1995) Ribosome modulation factor: stationary growth phase-specific  
995 inhibitor of ribosome functions from Escherichia coli. *Biochem Biophys Res Commun* **214**: 410-417
- 996  
997 Wayne L, Hayes, LG. (1996) An in vitro model for sequential study of shiftdown of Mycobacterium tuberculosis through two stages  
998 of nonreplicating persistence. *Infect Immun* **64**: 2062-2069
- 999  
1000 Wayne L, Sohaskey, CD. (2001) Nonreplicating persistence of mycobacterium tuberculosis. *Annu Rev Microbiol* **55**: 139-163
- 1001  
1002 Yamagishi M, Matsushima, H., Wada, A., Sakagami, M., Fujita, N., Ishihama, A. (1993) Regulation of the Escherichia coli rmf gene  
1003 encoding the ribosome modulation factor: growth phase- and growth rate-dependent control. *EMBO J* **12**: 625-630

1004  
1005 Yokoyama W, Christensen M, Dos Santos G., Miller, D., Ho, J., Wu, T., Dziegielewski, M., Neethling, FA. (2013) Production of  
1006 monoclonal antibodies. *Curr Protoc Immunol* **102**

1007  
1008 Zhang Y, Mandava, C. S., Cao, W., Li, X., Zhang, D., Li, N., Zhang, Y., Zhang, X., Qin, Y., Mi, K., Lei, J., Sanyal, S. & Gao, N.  
1009 (2015) HflX is a ribosome-splitting factor rescuing stalled ribosomes under stress conditions. *Nat Struct Mol Biol* **22**: 906-913

1010  
1011  
1012  
1013  
1014  
1015  
1016  
1017  
1018  
1019  
1020  
1021  
1022  
1023  
1024  
1025  
1026  
1027  
1028  
1029  
1030  
1031  
1032  
1033  
1034  
1035

1036 **Figure Legends**

1037 **Figure 1. GTPase and ATPase activities of purified mycobacterial HflX.**

- 1038 A. Quantification of inorganic phosphate (IPO<sub>4</sub>) released over time in the presence of GTP with Mtb  
1039 HflX, GTPase-abrogated Mtb HflX AAY or *E.coli* HflX. Data show mean ± SD of three independent  
1040 experiments.
- 1041 B. Quantification of inorganic phosphate (IPO<sub>4</sub>) released over time in the presence of ATP with Mtb HflX,  
1042 GTPase truncated Mtb HflX AAY or *E.coli* HflX. Data show mean ± SD of three independent  
1043 experiments.
- 1044 C, D. Binding of HflX to GDP. (C) Representative differential power (DP) trace of the isothermal titration  
1045 calorimetry (ITC) experiment. (D) Binding curve of the same experiment, obtained by integrating the DP  
1046 signal. Two independent experiments were performed. Results from one representative of two  
1047 independent experiments are shown.

1048

1049 **Figure 2. Infection profile of BCG □HflX in the mouse model.**

- 1050 A. CFU counts from BCG WT,  $\Delta hflX$  and complemented strains before and after heat shock stress as  
1051 described in methods. Data show mean ± SD of three independent experiments.
- 1052 B. CFU counts from *E.coli* WT,  $\Delta hflX$ , and  $\Delta hflX$  complemented with homologous HflX or with BCG  
1053 codon-optimized HflX after heat shock stress as described in methods. Data show mean ± SD of  
1054 three independent experiments.
- 1055 C. OD<sub>600</sub> of BCG WT,  $\Delta hflX$  and complemented strains in the gradual hypoxia Wayne model. Red arrow,  
1056 WT reached NRP-1; Blue arrow, WT reached NRP-2. Data show mean ± SD of four independent  
1057 experiments.
- 1058 D. CFU from BCG WT,  $\Delta hflX$  and complemented strains in the gradual hypoxia Wayne model. Data  
1059 show mean ± SD of four independent experiments.
- 1060 E. Representative images of BCG WT,  $\Delta hflX$  and complemented strains obtained by scanning electron  
1061 microscopy on day 0, 8 and 17 of the Wayne model. Scale bar = 1µm.
- 1062 F. Average length of BCG WT,  $\Delta hflX$  and complemented strains based on 20 bacteria counted for each  
1063 strain and on day 0, 8 and 17 of the Wayne model.
- 1064 G. CFU counts from C57BL/6 mice infected with BCG WT,  $\Delta hflX$  and complemented strains. Organs  
1065 were harvested at week 8, 12 and 16 post-infection. One representative experiment out of two is  
1066 shown.

1067 Data information: All data show mean ± SD \*P < 0.05, \*\*P < 0.01, \*\*\*P < 0.001. Panels (B, F, G) one-way  
1068 ANOVA with Bonferroni post-test.

1069

1070 **Figure 3. Energetic status, drug susceptibility and expression of the *dos* regulon in BCG □HflX.**

- 1071 A. Intracellular ATP level in BCG WT,  $\Delta hflX$  and complemented strains grown in the Wayne model. Data  
1072 show mean ± SD of three independent experiments.

- 1073 B. Membrane potential of BCG WT,  $\Delta hflX$  and complemented strains grown in the Wayne model. +  
1074 CCCP as a membrane disruptor positive control. One representative of two independent experiments  
1075 shown.
- 1076 C. CFU from BCG WT,  $\Delta hflX$  and complemented strains on day 8 of the Wayne model treated with  
1077 various drugs. Data show mean  $\pm$  SD of two independent experiments.
- 1078 D. CFU from BCG WT,  $\Delta hflX$  and complemented strains on day 17 of the Wayne model treated with  
1079 various drugs. Data show mean  $\pm$  SD of two independent experiments.
- 1080 E. Relative gene expression of a subset of *dos* regulon genes measured by RT-PCR in BCG  $\Delta hflX$   
1081 compared to WT on day 8 of the Wayne model. Data show mean  $\pm$  SD of two independent  
1082 experiments.

1083

1084 **Figure 4. Differential protein expression in BCG  $\Delta hflX$  in response to hypoxia.**

- 1085 A-C. Volcano plot of differentially expressed proteins in BCG  $\Delta hflX$  compared to WT on day 0 (A,  
1086 normoxia), day 8 (B, NRP-1) and day 17 (C, NRP-2) of Wayne model.
- 1087 D-E. Gene ontology analysis (biological functions) of the differentially expressed proteins in BCG  $\Delta hflX$   
1088 compared to WT on day 0 (D, normoxia), day 8 (E, NRP-1) and 17 (F, NRP-2) of Wayne model with false  
1089 discovery rate < 0.05.

1090

1091 **Figure 5. Translational activity in BCG  $\Delta hflX$ .**

- 1092 A. Ribosome sequencing data showing the percentage of mapped reads to respective regions of BCG  
1093  $\Delta hflX$  compared to WT on day 8 (NRP-1) of Wayne model. CDS: coding sequence; Other: 5' and 3'  
1094 untranslated regions (UTR). Data show mean  $\pm$  SD of two independent experiments.
- 1095 B. Volcano plot of differential translation efficiency (TE) between BCG  $\Delta hflX$  and WT on day 8 (NRP-1)  
1096 of Wayne model. Highlighted in light grey: False discovery rate <0.05.
- 1097 C-D. Gene ontology analysis and KEGG pathways analysis of the differentially translated genes in BCG  
1098  $\Delta hflX$  compared to WT on day 8 (NRP-1) of Wayne model. Enriched pathways were selected where  
1099 false discovery rate was <0.05.

1100

- 1101 **Figure 6. Illustration of the role of mycobacterial HflX in the hypoxic stress.** As oxygen tension  
1102 decreases, accumulation of stalled ribosomes and translation-incompetent hibernating ribosomes results  
1103 in lower translational activity that eventually leads to bacterial replication arrest. By splitting stalled  
1104 ribosomes and hibernating ribosomes, HflX controls the pool of translationally active ribosomes, thereby  
1105 controlling the overall translational activity of the bacterium, and entry into the non-replicating state.

1106

1107

1108

1109

1110

1111 **Table**

1112 **Table 1. Protein candidates identified from pull-down experiment with anti-HflX antibody.**

1113

| Accession         | Gene        | Protein Name                                                       | Mass (Da)    | co-IP score (emPAI) |
|-------------------|-------------|--------------------------------------------------------------------|--------------|---------------------|
| A0A0H3M750        | hflX        | GTPase HflX                                                        | 53467        | 3.47                |
| A1KKF4            | pup         | Prokaryotic ubiquitin-like protein Pup                             | 6940         | 0.78                |
| <b>A0A0H3M2V9</b> | <b>rpsQ</b> | <b>30S ribosomal protein S17 rpsQ</b>                              | <b>14863</b> | <b>0.74</b>         |
| <b>A1KGK3</b>     | <b>rpmD</b> | <b>50S ribosomal protein L30 rpmD</b>                              | <b>7342</b>  | <b>0.73</b>         |
| A0A0G2Q9J0        | BCG_3320c   | Probable transcriptional regulatory protein (Probably asnC-family) | 16586        | 0.65                |
| <b>A1KLD7</b>     | <b>rpmA</b> | <b>50S ribosomal protein L27 rpmA</b>                              | <b>8963</b>  | <b>0.57</b>         |
| A0A0H3M4W6        | BCG_1022    | Uncharacterized protein                                            | 10257        | 0.49                |
| A0A0H3M700        | BCG_2330    | Uncharacterized protein                                            | 10648        | 0.47                |
| <b>A1KEM1</b>     | <b>rpsF</b> | <b>30S ribosomal protein S6 rpsF</b>                               | <b>10928</b> | <b>0.46</b>         |
| A0A0H3M4Y6        | BCG_1046c   | Conserved hypothetical serine rich protein                         | 11679        | 0.42                |
| A0A0H3M2K2        | BCG_0617c   | Uncharacterized protein                                            | 12826        | 0.38                |
| A0A0H3M725        | glyS        | Glycine-tRNA ligase glyS                                           | 53019        | 0.37                |
| A0A0H3M6K7        | argD        | Acetylornithine aminotransferase argD                              | 41055        | 0.36                |
| A0A0H3MGK2        | BCG_2879c   | Probable short-chain type dehydrogenase/reductase                  | 27016        | 0.36                |
| A0A0H3M2I4        | BCG_0590c   | Uncharacterized protein                                            | 14337        | 0.34                |
| A0A0H3M2Q7        | BCG_0685    | Uncharacterized protein                                            | 14895        | 0.32                |
| A0A0H3M568        | BCG_2020c   | Uncharacterized protein                                            | 31315        | 0.31                |
| A0A0G2Q9F9        | cwsA        | Cell wall synthesis protein CwsA                                   | 15671        | 0.3                 |

1114 **Bolded – ribosomal subunits**

1115

1116

1117

1118

1119

1120

1121

1122

1123

1124

1125

1126

1127

1128 **Appendix Figure Legends**

1129 **Figure S1.**

- 1130 A. Protein sequence alignment of mycobacterial and *E. coli* HflX. Protein motifs important for GTPase  
1131 function were also identified (red boxes). G1–5 boxes (circled), Switch I and II regions (boxed).  
1132 B. Computational modelling of Mtb H37Rv HflX superimposed with *E. coli* HflX crystal structure. Model  
1133 quality was determined by the percentage of residues that were successfully modelled (Model  
1134 Coverage). Alignment quality for complete models and their individual domains were quantified by an  
1135 RMSD score where 0 indicates perfect alignment.

1136

1137 **Figure S2.**

- 1138 A. Schematic illustration of Mtb pHflX, abrogated GTPase Mtb pHflX AAY and *E. coli* HflX.  
1139 B. Coomassie gel showing purified Mtb pHflX.  
1140 C. GTPase activity of purified Mtb HflX in the presence or absence of magnesium ion.  
1141 D. ELISA validation of the anti-HflX monoclonal Ab with coated HflX antigen. Data show mean  $\pm$  SD of  
1142 two independent experiments.  
1143 E. Dot blot validation of anti-HflX monoclonal Ab detecting purified Mtb HflX.

1144

1145 **Figure S3.**

- 1146 A. Schematic representation of the genetic construct of BCG  $\Delta hflX$  and complemented strains as  
1147 described in the methods.  
1148 B. Expression level of *hflX* in BCG WT,  $\Delta hflX$  and complemented strains determined by RT-PCR. Data  
1149 show mean  $\pm$  SD of two independent experiments.  
1150 C. Growth profile of BCG WT,  $\Delta hflX$  and complemented strains grown in 7H9 medium (normoxia). Data  
1151 show mean  $\pm$  SD of two independent experiments.  
1152 D. Expression level of *hflX* determined by RT-PCR in *E. coli* WT,  $\Delta hflX$  and  $\Delta hflX$  complemented with  
1153 homologous HflX or codon-optimized BCG HflX.

1154

1155 **Figure S4.**

- 1156 A. CFU from BCG WT,  $\Delta hflX$  and complemented strains grown in Loebel starvation model as described in  
1157 the methods. Data show mean  $\pm$  SD of two independent experiments.  
1158 B. CFU from THP-1 macrophage infected with BCG WT,  $\Delta hflX$  and complemented strains (MOI: 2) as  
1159 described in the methods. Data show mean  $\pm$  SD of three independent experiments.  
1160 C-D. Expression of *dos* regulon genes determined by RT-PCR in BCG WT and  $\Delta hflX$  on day 0 (C) or day  
1161 17 (D) of the Wayne model. Data show mean  $\pm$  SD of two independent experiments.  
1162 E. CFU counts from C57BL/6 mice infected with BCG WT,  $\Delta hflX$  and complemented strains. Organs were  
1163 harvested at week 2 and 4 post-infection. LOD, limit of detection.

1164 Data information: All data show mean  $\pm$  SD, \*P < 0.05. Panels (E) one-way ANOVA with Bonferroni post-  
1165 test.

1166

1167 **Figure S5.**

1168 RNA sequencing data showing the percentage of mapped reads to respective regions of BCG  $\Delta hflX$   
1169 compared to WT on day 8 (NRP-1) of Wayne model. CDS: coding sequence; Other: 5' and 3'  
1170 untranslated regions (UTR). Data show mean  $\pm$  SD of two independent experiments.

1171

1172

1173

1174

1175

1176

1177

1178

1179

1180

1181

1182

1183

1184

1185

1186

1187

1188

1189

1190

1191

1192



1193 **Appendix Table S1. Minimum Inhibitory Concentration of drugs against BCG WT,  $\Delta$ HfIX and**  
1194 **complemented strains grown in 7H9 medium (normoxia).**

| Strains                                     | MIC50 ( $\mu$ M) |      |      |      |      |    |       |
|---------------------------------------------|------------------|------|------|------|------|----|-------|
|                                             | BDQ              | INH  | RIF  | ETM  | STM  | CM | ERT   |
| <b>BCG WT</b>                               | 0.05             | 1.25 | 0.1  | 8    | 1    | 25 | 3.125 |
| <b>BCG <math>\Delta</math>hflX</b>          | 0.06             | 1.25 | 0.1  | 6.25 | 1.25 | 30 | 6.25  |
| <b>BCG <math>\Delta</math>hflX :: phflX</b> | 0.05             | 1.25 | 0.06 | 6.25 | 1    | 25 | 4     |

BDQ: Bedaquiline; INH: Isoniazid; RIF: Rifampicin; ETM: Ethambutol; STM: Streptomycin; CM: Chloramphenicol; ERT: Erythromycin

1195

1196

**Fig 1.**

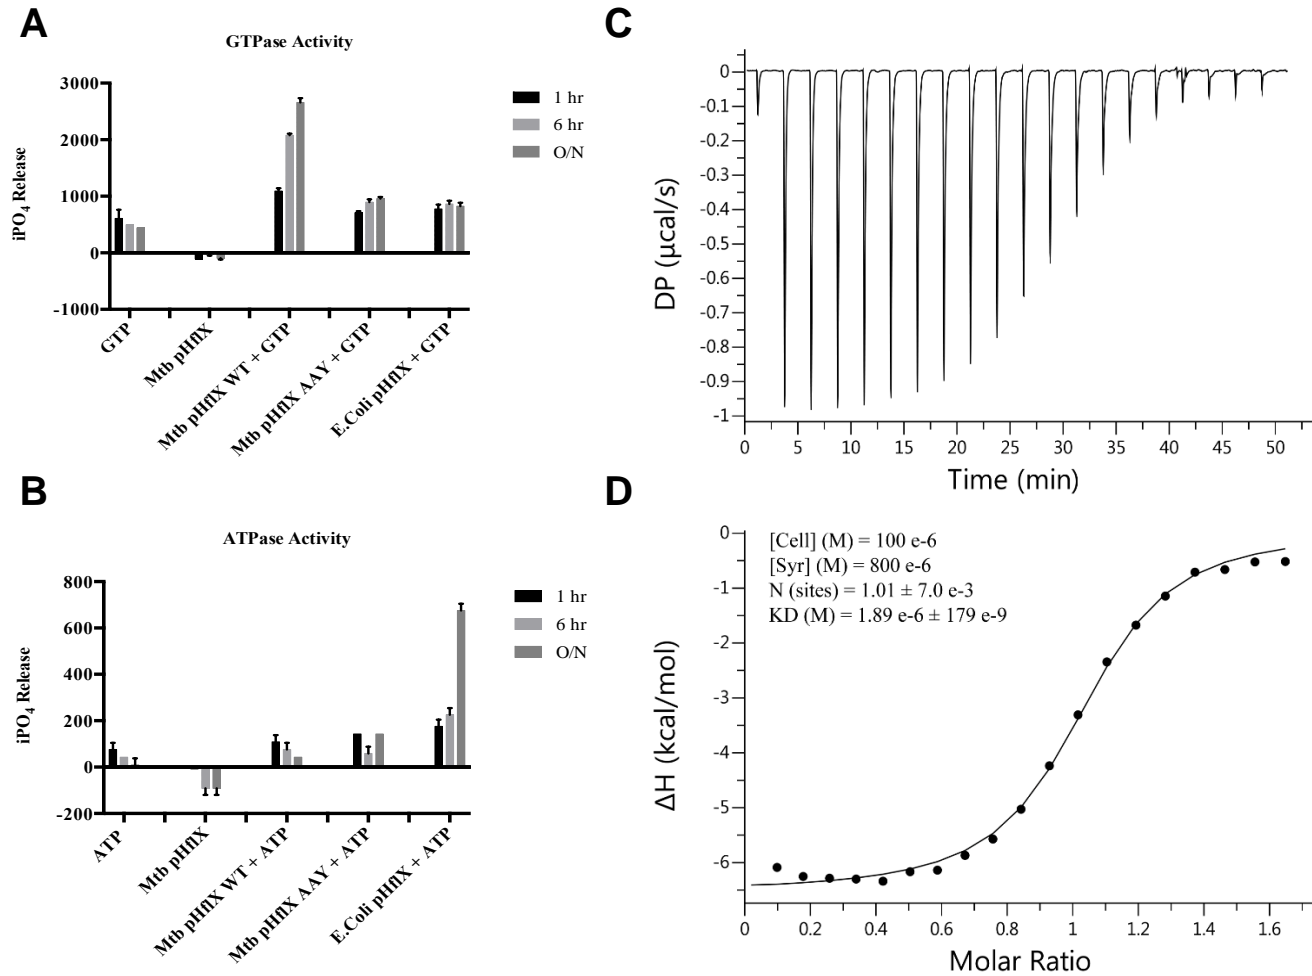

**Fig 2.**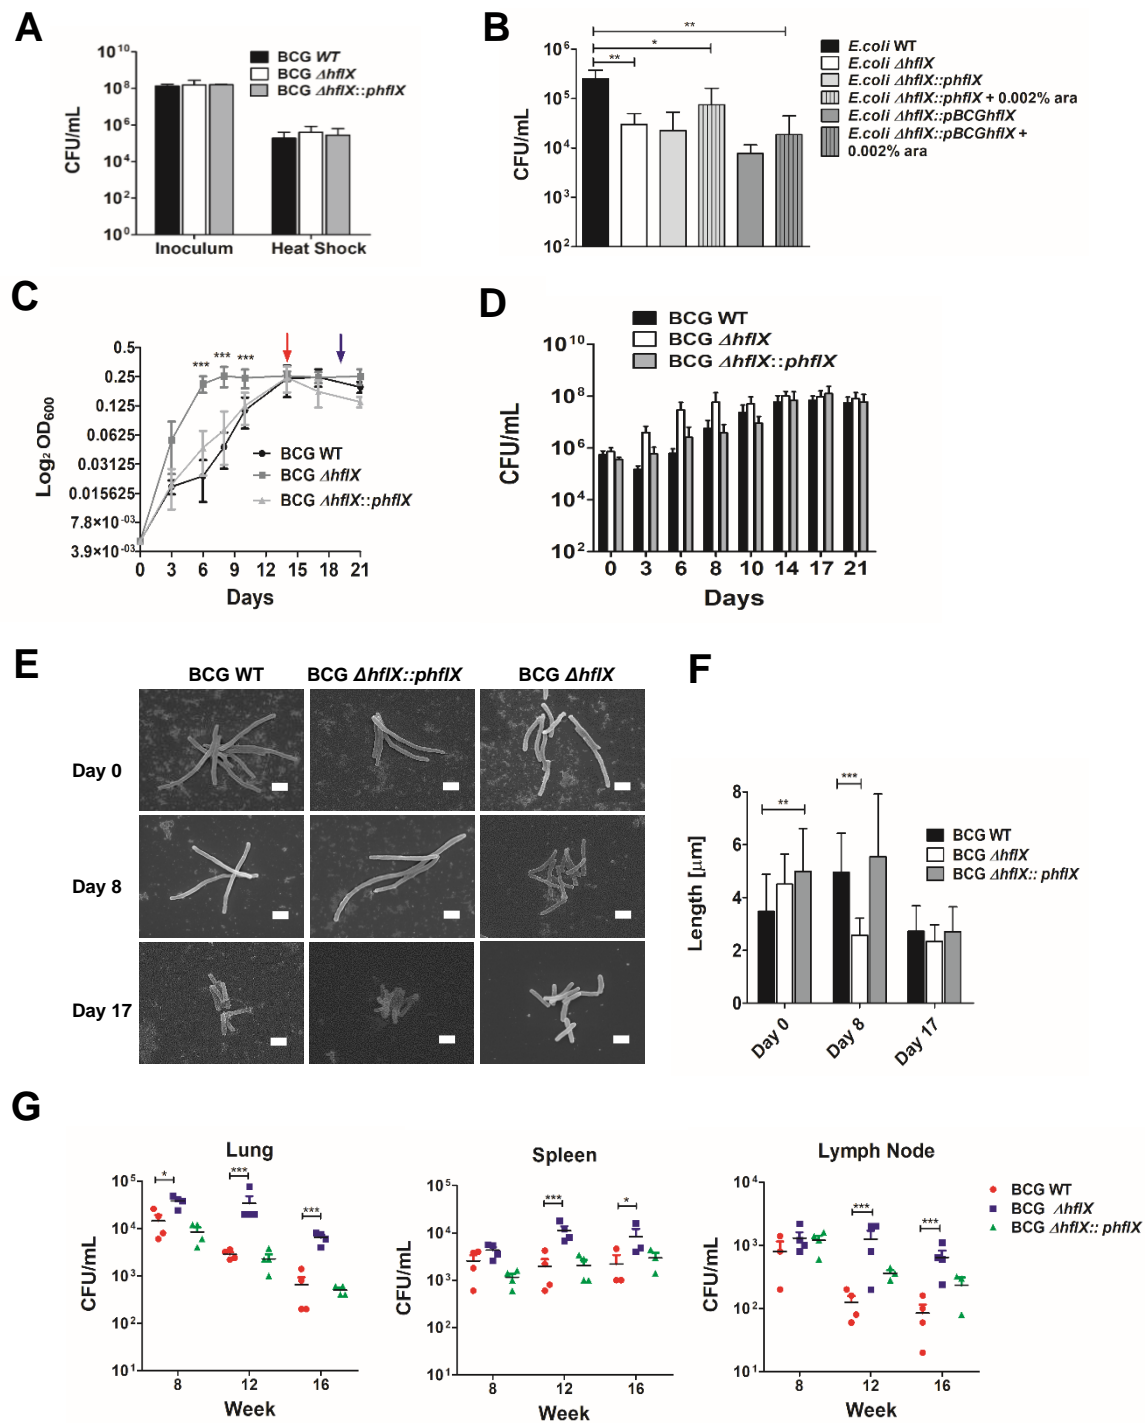

**Fig 3.**

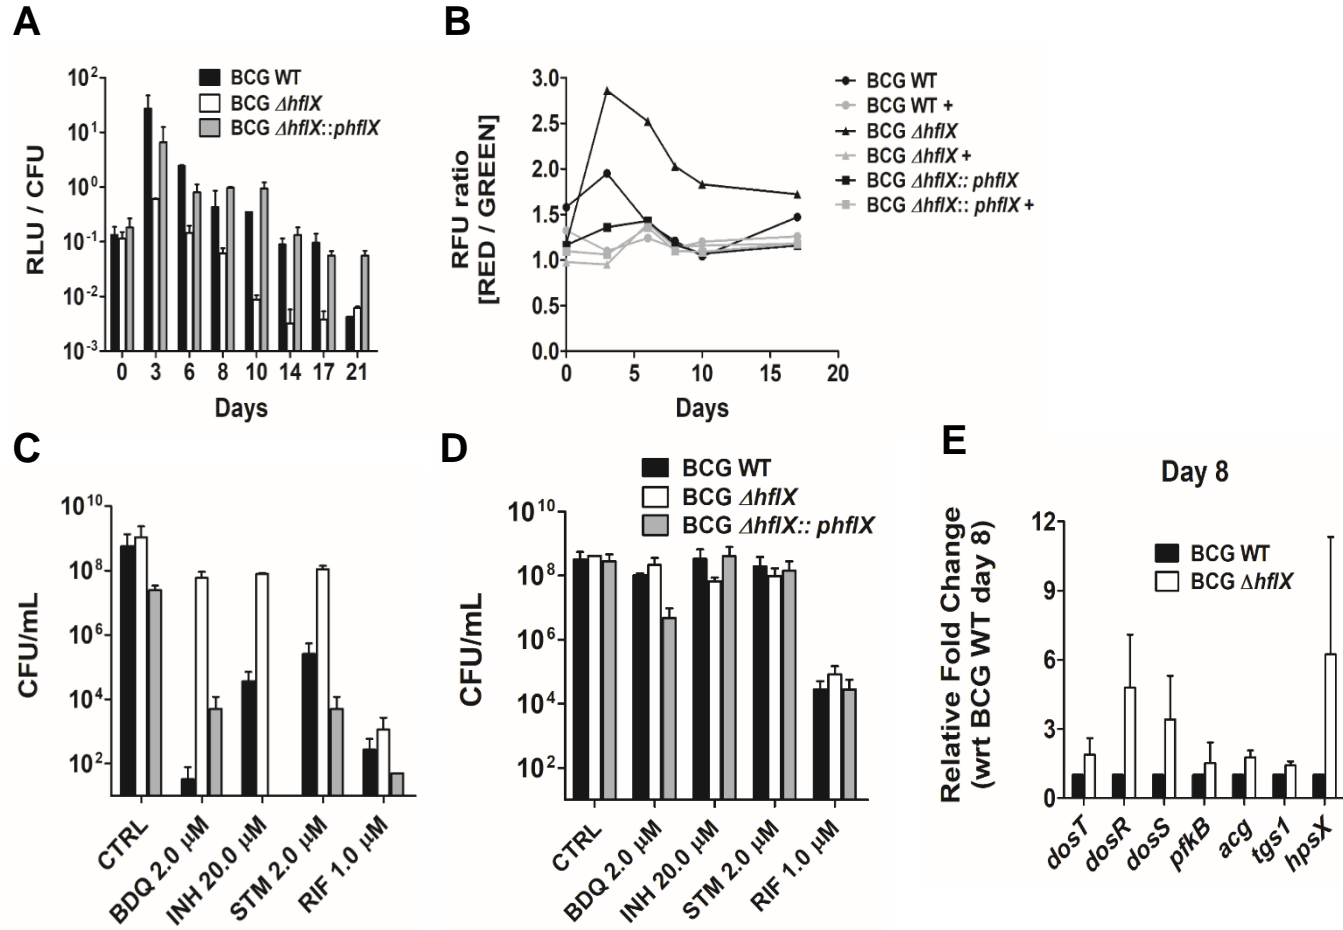

**Fig 4.**

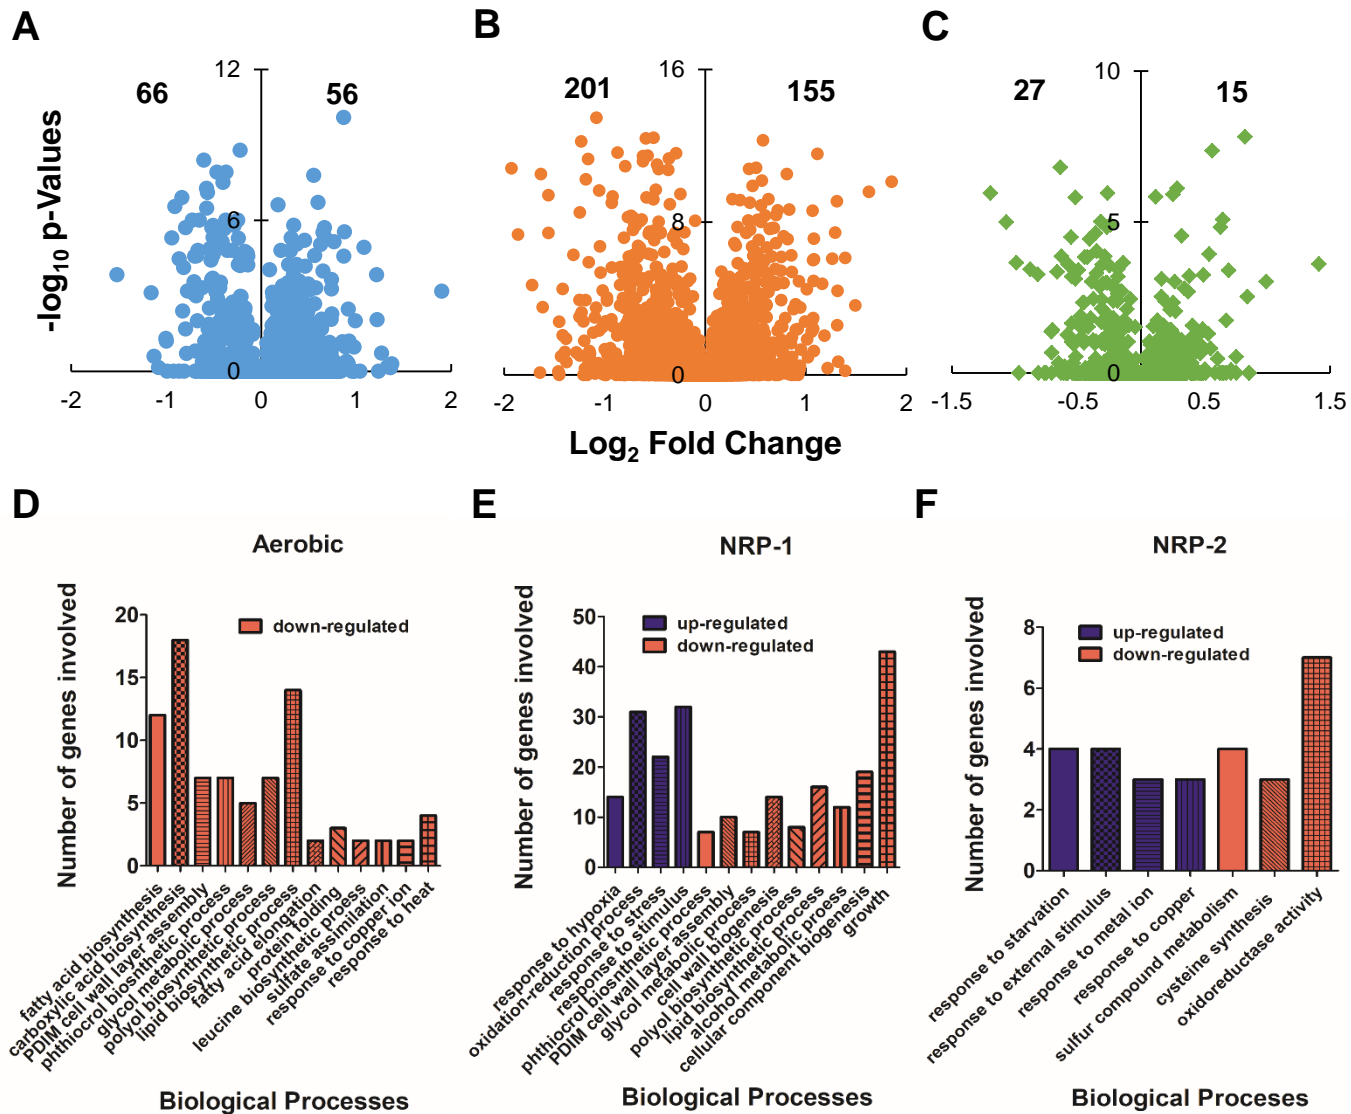

Fig 5.

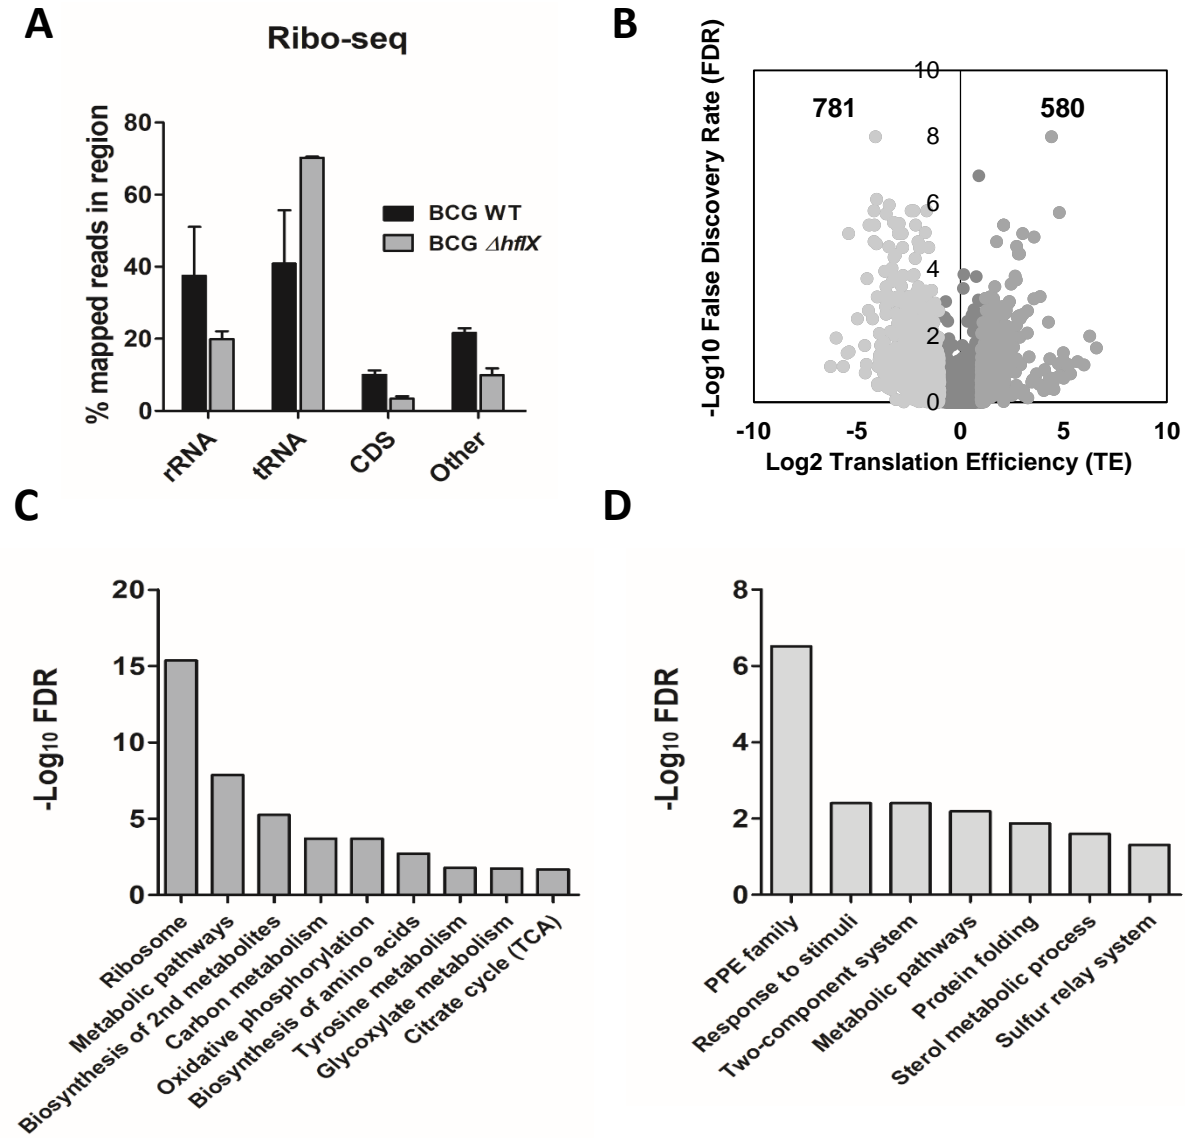

**Fig 6.**

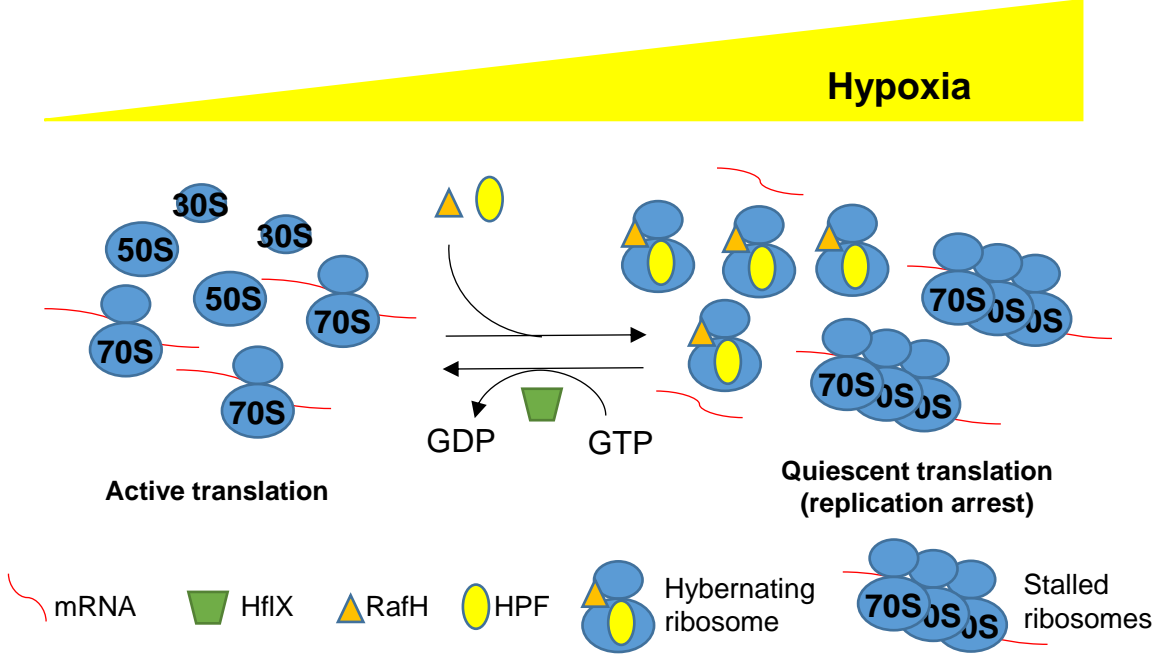

# Appendix Figures



# Appendix Fig S1.

A

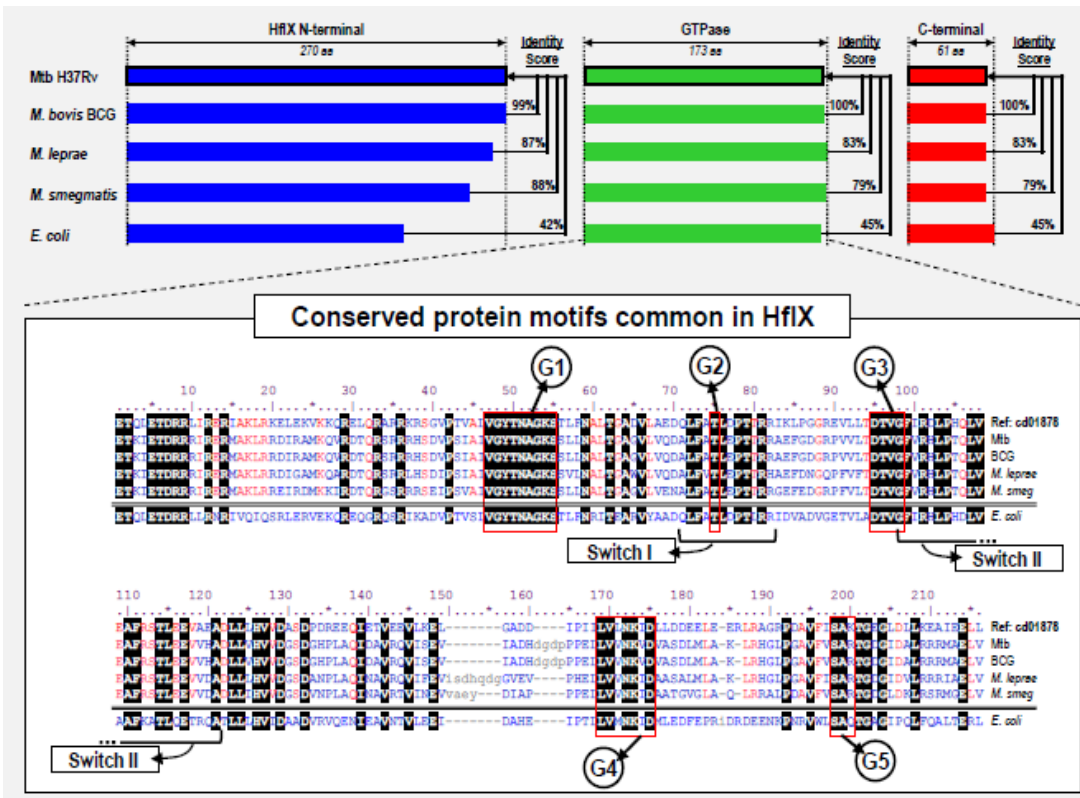

B

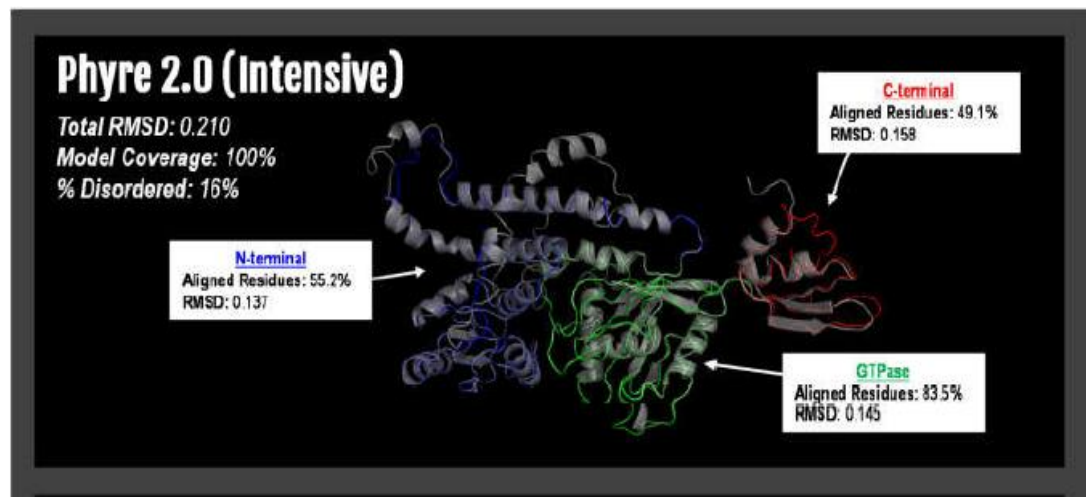

# Appendix Fig S2.

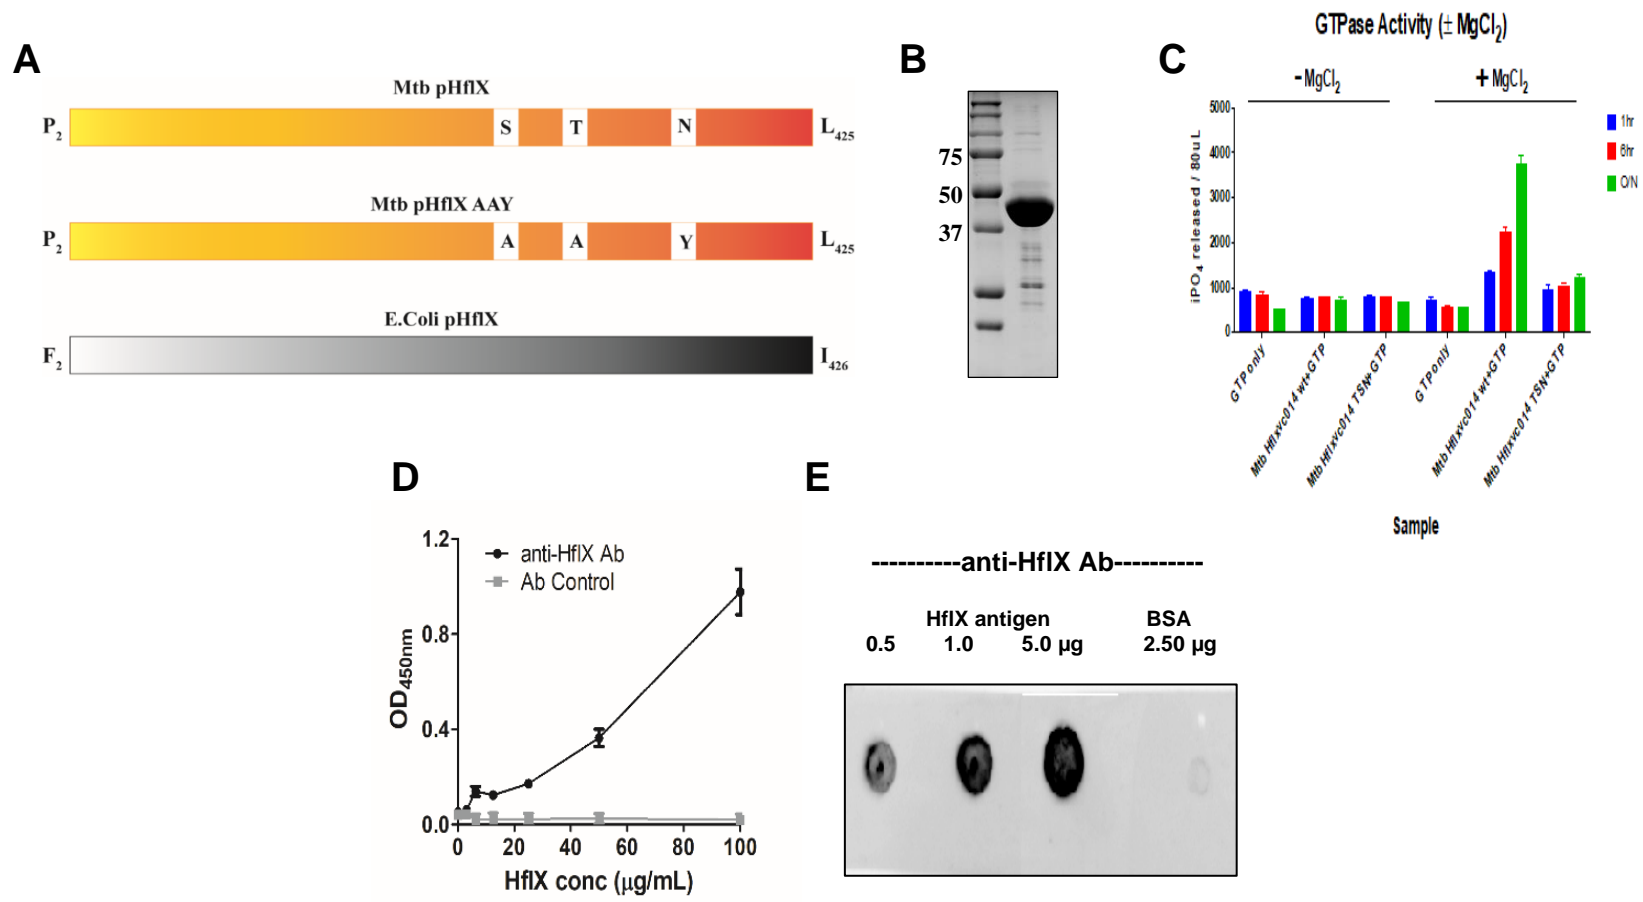

# Appendix Fig S3.

**A**

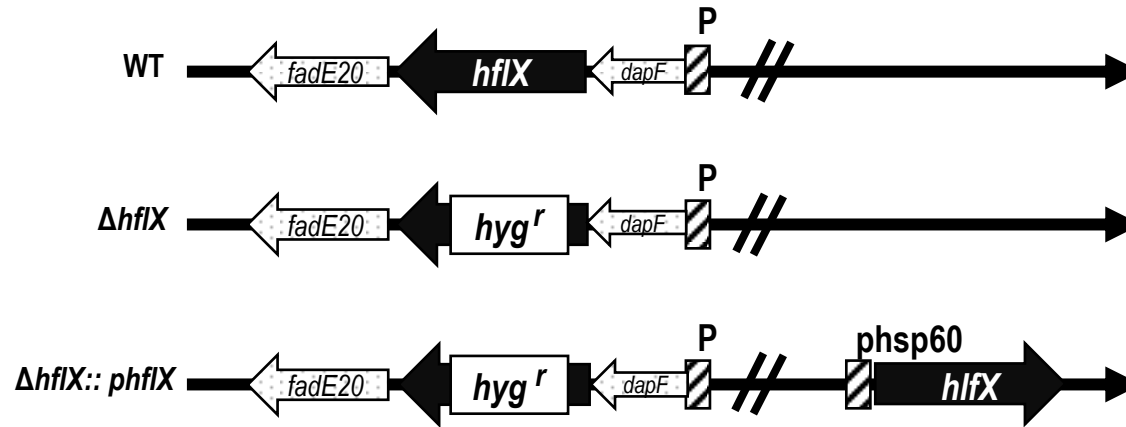

**B**

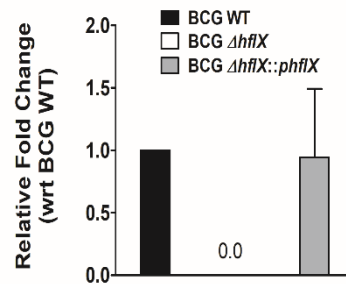

**C**

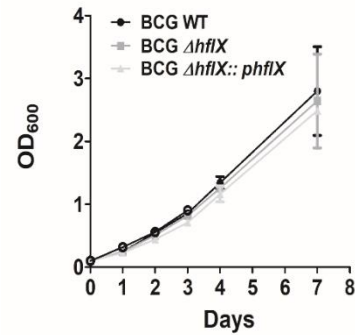

**D**

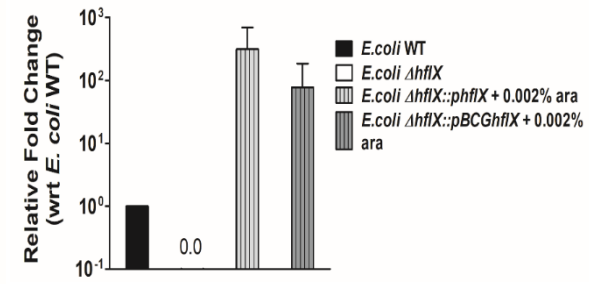

# Appendix Fig S4.

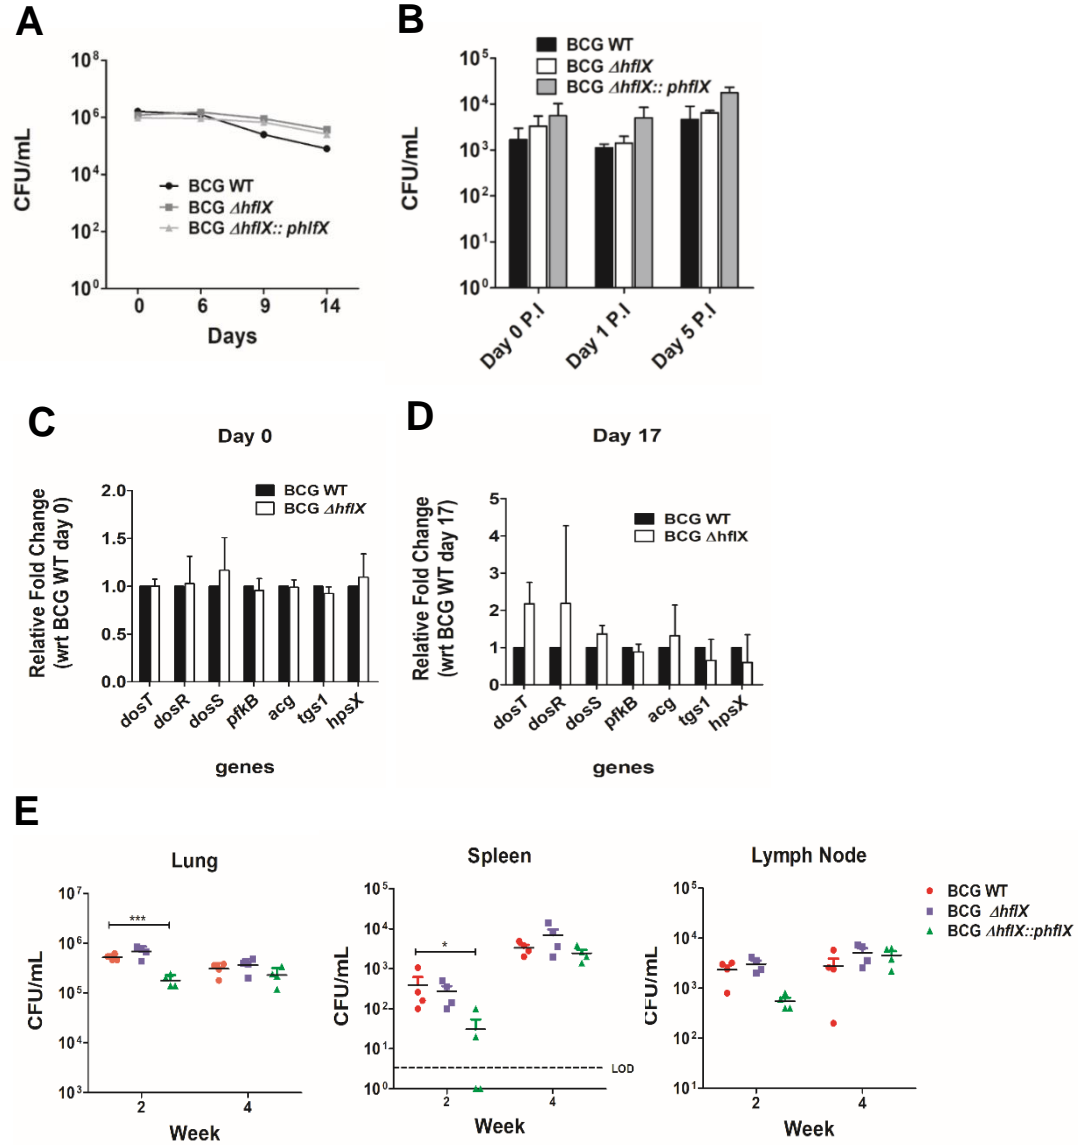

Appendix Fig S5.

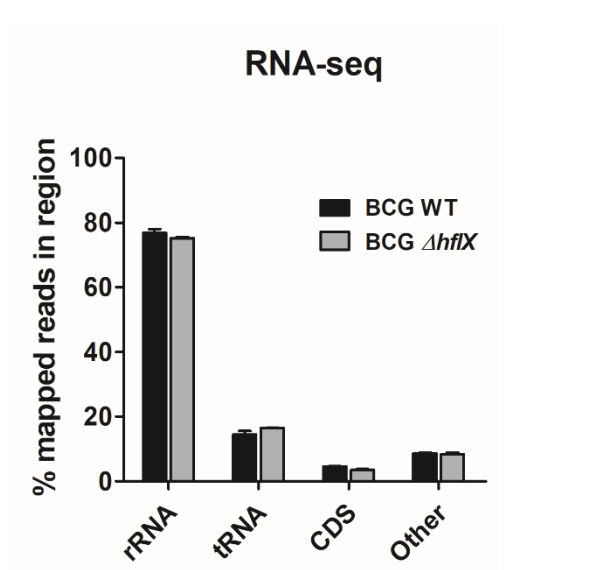

Source: https://www.biorxiv.org/content/biorxiv/early/2020/03/15/2020.03.13.990168.full.pdf
